# Excitable axonal domains adapt to sensory deprivation in the olfactory system

Nicholas M George<sup>1,2,3</sup>, Wendy B Macklin<sup>2</sup>, Diego Restrepo<sup>2,3</sup>

**\*For correspondence:**

[Diego.restrepo@cuanschutz.edu](mailto:Diego.restrepo@cuanschutz.edu) (DR);  
[Wendy.macklin@cuanschutz.edu](mailto:Wendy.macklin@cuanschutz.edu) (WBM)

<sup>1</sup>Neuroscience Program; <sup>2</sup>Department of Cell and Developmental Biology, University of Colorado Anschutz Medical Campus, Aurora, United States; <sup>3</sup>Rocky Mountain Taste and Smell Center

---

## Abstract

The axon initial segment, nodes of Ranvier, and the oligodendrocyte-derived myelin sheath have significant influence on the firing patterns of neurons and the faithful, coordinated transmission of action potentials to downstream brain regions. In the olfactory bulb, olfactory discrimination tasks lead to adaptive changes in cell firing patterns, and the output signals must reliably travel large distances to other brain regions along highly myelinated tracts. Whether myelinated axons adapt to facilitate olfactory sensory processing is unknown. Here, we investigate the morphology and physiology of mitral cell axons in the adult olfactory system, and show that unilateral sensory deprivation causes system-wide adaptations in axons. Mitral cell spiking patterns and action potentials also adapted to sensory deprivation. Strikingly, both axonal morphology and mitral cell physiology were altered on both the deprived and non-deprived sides, indicating system level adaptations to reduced sensory input. Our work demonstrates a previously unstudied mechanism of plasticity in the olfactory system.

---

## Introduction

In the olfactory bulb (OB), the firing rates and synchronized firing patterns of mitral (MC) and tufted cells encode vital olfactory information such as odor identity and odor salience (whether an odor deserves attention) (*Friedrich et al., 2004; Doucette et al., 2011; Lepousez and Lledo, 2013; Gire et al., 2013*). The precise signals generated in the mouse OB must faithfully travel several millimeters along myelinated axonal tracts before reaching other brain regions such as the piriform cortex (*Nagayama et al., 2010; Imamura et al., 2020; Chon et al., 2020; Walz et al., 2006; Schwob and Price, 1984*). Downstream neurons in the piriform cortex are very sensitive to synchronized input, often failing to fire if the latency of incoming action potentials (APs) is greater than 10ms (*Franks and Isaacson, 2006; Luna and Schoppa, 2008; Bolding and Franks, 2018*). Despite the importance of reliable, synchronized olfactory signals and the large distances these signals must travel, little is known about the structure and function of the myelinated axons that govern signal reliability and timing in the olfactory system.

Excitable axonal domains such as the axon initial segment (AIS) and nodes of Ranvier, as well as the insulating myelin sheath, regulate cellular excitability, firing patterns, and conduction speed (*Kole, 2011; Evans et al., 2015; Castelfranco and Hartline, 2016*). The AIS is the portion of the axon close to the soma and is defined by a high density of voltage gated sodium channels necessary

41 for initiating APs and defining features of their kinetics and shape (*Kole et al., 2007; Palmer and*  
42 *Stuart, 2006; Kole et al., 2008*). On myelinated axons, the myelin sheath and axon form specialized  
43 domains called nodes of Ranvier. Nodes of Ranvier allow for fast saltatory conduction by regener-  
44 ating APs as they travel along an axon (*Susuki et al., 2013; Castelfranco and Hartline, 2016*). The  
45 myelin sheath itself is produced by oligodendrocytes in the central nervous system and provides  
46 electrical insulation on stretches of axon between nodes of Ranvier. These stretches of insulated  
47 axon, which are vital for fast saltatory conduction, also provide trophic and metabolic support to  
48 axons (*Castelfranco and Hartline, 2016; Meyer et al., 2018; Fünfschilling et al., 2012*). Importantly,  
49 the organization of myelinated axons is not static. Both *in vitro* and *in vivo*, the AIS changes position,  
50 ion channel composition, and length in response to activity deprivation and stimulation paradigms,  
51 with significant consequences for cellular excitability (*Kuba et al., 2010; Grubb and Burrone, 2010;*  
52 *Evans et al., 2015; Jamann et al., 2021*). Nodes of Ranvier develop specific sizes and spacing to  
53 optimize AP timing in the auditory brainstem (*Ford et al., 2015*), while the myelin sheath and oligo-  
54 dendrocyte lineage cells respond to neuronal activity and change throughout life (*Hill et al., 2018;*  
55 *Hughes et al., 2018; Gibson et al., 2014*). Computational modeling and experimental studies high-  
56 light the importance of myelinated axons for synchronized firing, AP reliability, and optimizing AP  
57 conduction speed (*Arancibia-Cárcamo et al., 2017; Pajevic et al., 2014; Kim et al., 2013*). Whether  
58 myelinated axons adapt to facilitate olfactory sensory processing is unknown.

59  
60 Here, we investigated the AIS, nodes of Ranvier, and myelin sheaths (together referred to as  
61 myelinated axons) in the mouse OB and lateral olfactory tract (LOT). To determine whether these  
62 structures adapt to changing sensory input *in vivo*, we used adult unilateral naris occlusion (UNO)  
63 (*Baker et al., 1993; Kass et al., 2013; Coppola, 2012*) to suppress olfactory input and evaluated  
64 changes in myelinated axons and oligodendrocyte lineage cells. We found morphological adapta-  
65 tions in the AIS and nodes of Ranvier, and physiological changes in AP generation in MCs. In con-  
66 trast to developmental UNO (*Collins et al., 2018*), we found no changes in relative myelin sheath  
67 thickness or oligodendrocyte lineage cell density. Whole cell patch-clamp experiments on MCs re-  
68 vealed increased AP amplitude and width following UNO, as well as altered cell firing. Our findings  
69 raise the possibility that excitable axonal domains may adapt to facilitate olfactory sensory pro-  
70 cessing in the adult.

## 72 Results

### 73 Quantification of mitral cell axon initial segments in the olfactory bulb and nodes 74 of Ranvier in the lateral olfactory tract

75 The coordinated, precise firing of groups of MCs encodes olfactory information in the OB, and fir-  
76 ing patterns of MCs change as an animal learns to identify odors in olfactory discrimination tasks  
77 (*Gire et al., 2013; Doucette et al., 2011; Lepousez and Lledo, 2013; Chu et al., 2016; Gschwend et al.,*  
78 *2015*). The AIS is the site of AP initiation, and its morphological structure and ion channel compo-  
79 sition determines AP threshold, AP width and amplitude, and other important firing properties of  
80 the cell (*Palmer and Stuart, 2006; Kole et al., 2007, 2008; Kole and Stuart, 2012; Jamann et al., 2021*).

81  
82 MCs are known to have identifiable AISs similar to other brain regions (*Lorincz and Nusser,*  
83 *2008; Price and Powell, 1970; Hinds and Ruffett, 1973*), but their structure and size distributions  
84 in OB are not well understood. We measured the length of MC AISs in 3D volumes using immuno-  
85 histochemistry and confocal microscopy (*Figure 1*). The OB is a highly stratified structure whose  
86 layers are clearly delimited using the nuclear label Hoechst (*Figure 1B*). The histochemical dye Nissl  
87 (NeuroTrace, Thermo Fisher Scientific) broadly labels cells in the OB, and MCs could be clearly iden-  
88 tified based on their large Nissl+ somas and their location in the mitral cell layer (MCL). AnkyrinG  
89 (AnkG) is a cytoskeletal scaffolding protein essential for the structure and function of the AIS (*Hed-*

90 *strom et al., 2008*). The AnkG+ AIS of MCs extended directly off of the MC soma, often immediately  
91 into the first myelinated internode (*Figure 1B'*, white arrowheads mark AIS start, yellow mark the  
92 end). AISs were measured in 3D volumes using the ImageJ/Fiji plugin Simple Neurite Tracer (SNT)  
93 (*Arshadi et al., 2020*), starting at the AnkG label originating at the base of the Nissl+ cell body and  
94 terminating at the distal end of the AnkG label. The mean length of MC AISs in the OB was  $25.7$   
95  $\pm 3.81\mu\text{m}$  (lengths are given as mean  $\pm$  standard deviation [SD],  $n = 687$  AISs from 4 animals [*Fig-*  
96 *ure 1C*]).

97  
98 While precise firing patterns are generated in the OB, MC axons must carry these signals out  
99 of the OB to the piriform cortex and other brain regions via the highly myelinated LOT (*Nagayama*  
100 *et al., 2010; Imamura et al., 2020; Chon et al., 2020; Walz et al., 2006; Schwob and Price, 1984*).  
101 Nodes of Ranvier are the axonal gaps between the myelin sheaths along the axon. Nodes of Ranvier  
102 regenerate the AP as it travels along an axon in a process called saltatory conduction (*Susuki et al.,*  
103 *2013*). Tuning of node of Ranvier length or channel composition may be a sensitive way to regulate  
104 AP conduction velocity and synchrony (*Arancibia-Carcamo et al., 2017*). To assess the structure  
105 of nodes of Ranvier in the LOT, we used antibodies directed against contactin-associated protein  
106 (Caspr) and the voltage gated sodium channel  $\text{Na}_v1.6$ . Caspr marks the site of myelin sheath to  
107 axon adhesion and serves as an important ion diffusion barrier (*Bhat et al., 2001; Rios et al., 2003*),  
108 while  $\text{Na}_v1.6$  is the primary voltage gated sodium channel in mature nodes, responsible for regen-  
109 erating the AP (*Caldwell et al., 2000; Boiko et al., 2001; Rasband et al., 2003*). The LOT contains a  
110 high density of nodes clearly identified by  $\text{Na}_v1.6$  flanked by Caspr (*Figure 1D*). We measured node  
111 of Ranvier length manually by fitting a Gaussian to the fluorescence intensity profile of antibody  
112 labeled  $\text{Na}_v1.6$  and measuring the full width at half maximum of that fit (*Figure 1D',E*; see Methods).  
113 The mean length of nodes of Ranvier in the LOT was  $1.17 \pm 0.267\mu\text{m}$  (mean  $\pm$  SD  $n = 811$  nodes  
114 from 4 animals) (*Figure 1F*).

## 116 **Quantification of oligodendrocyte lineage cells and the myelin sheath**

117 In the central nervous system, the myelin sheath is made by oligodendrocytes. Oligodendrocytes  
118 develop from oligodendrocyte progenitor cells (OPCs), a population long known to proliferate, dif-  
119 ferentiate into oligodendrocytes, and produce myelin in response to neuronal activity (*Barres and*  
120 *Raff, 1993; Gibson et al., 2014; McKenzie et al., 2014; Young et al., 2013*). In the mouse olfactory  
121 system, a significant period of OPC differentiation and myelination begins around postnatal day  
122 (P) 10 and is largely complete by P30 (*Philpot et al., 1995; Collins et al., 2018*). Little is known  
123 about oligodendrocyte lineage cells in the mature olfactory system. The transcription factor Olig2  
124 marks the entire oligodendrocyte lineage, while PDGFR $\alpha$  marks immature OPCs and CC1 marks  
125 mature oligodendrocytes. We counted OPCs using antibodies directed against Olig2 and PDGFR $\alpha$ ,  
126 and oligodendrocytes using antibodies against Olig2 and CC1. We counted oligodendrocytes and  
127 OPCs in the granule cell layer (GCL) and the LOT of adult animals in 3D confocal volumes (*Fig-*  
128 *ure 2A-D*). The GCL contained an average of  $6.43\text{e-}6 \pm 3.17\text{e-}6$  OPCs/ $\mu\text{m}^3$  and  $3.36\text{e-}5 \pm 5.53\text{e-}6$   
129 oligodendrocytes/ $\mu\text{m}^3$  (cell counts are given as mean density  $\pm$  SD). The LOT contained  $7.49\text{e-}6$   
130  $\pm 2.1\text{e-}6$  OPCs/ $\mu\text{m}^3$  and  $9.98\text{e-}5 \pm 7.98\text{e-}6$  oligodendrocytes/ $\mu\text{m}^3$  (all cell counts were performed  
131 with a systematic random sampling scheme using 3-5 sections per animal, where  $n$  animals  $\geq 4$ ;  
132 see Methods).

133  
134 The myelin sheath provides electrical insulation and vital trophic/metabolic support to axons  
135 (*Castelfranco and Hartline, 2016; Meyer et al., 2018; Fünfschilling et al., 2012*). The  $g$ -ratio (pre-  
136 sented as axon perimeter / total fiber perimeter), is a measure of myelin thickness relative to axon  
137 diameter. The  $g$ -ratio has long been used in computational modeling studies as a parameter to  
138 assess the conduction velocity along myelinated axons (*Rushton, 1951; Chomiak and Hu, 2009*).  
139 Since axon size and myelin thickness ( $g$ -ratio) have significant effects on axonal conduction veloc-

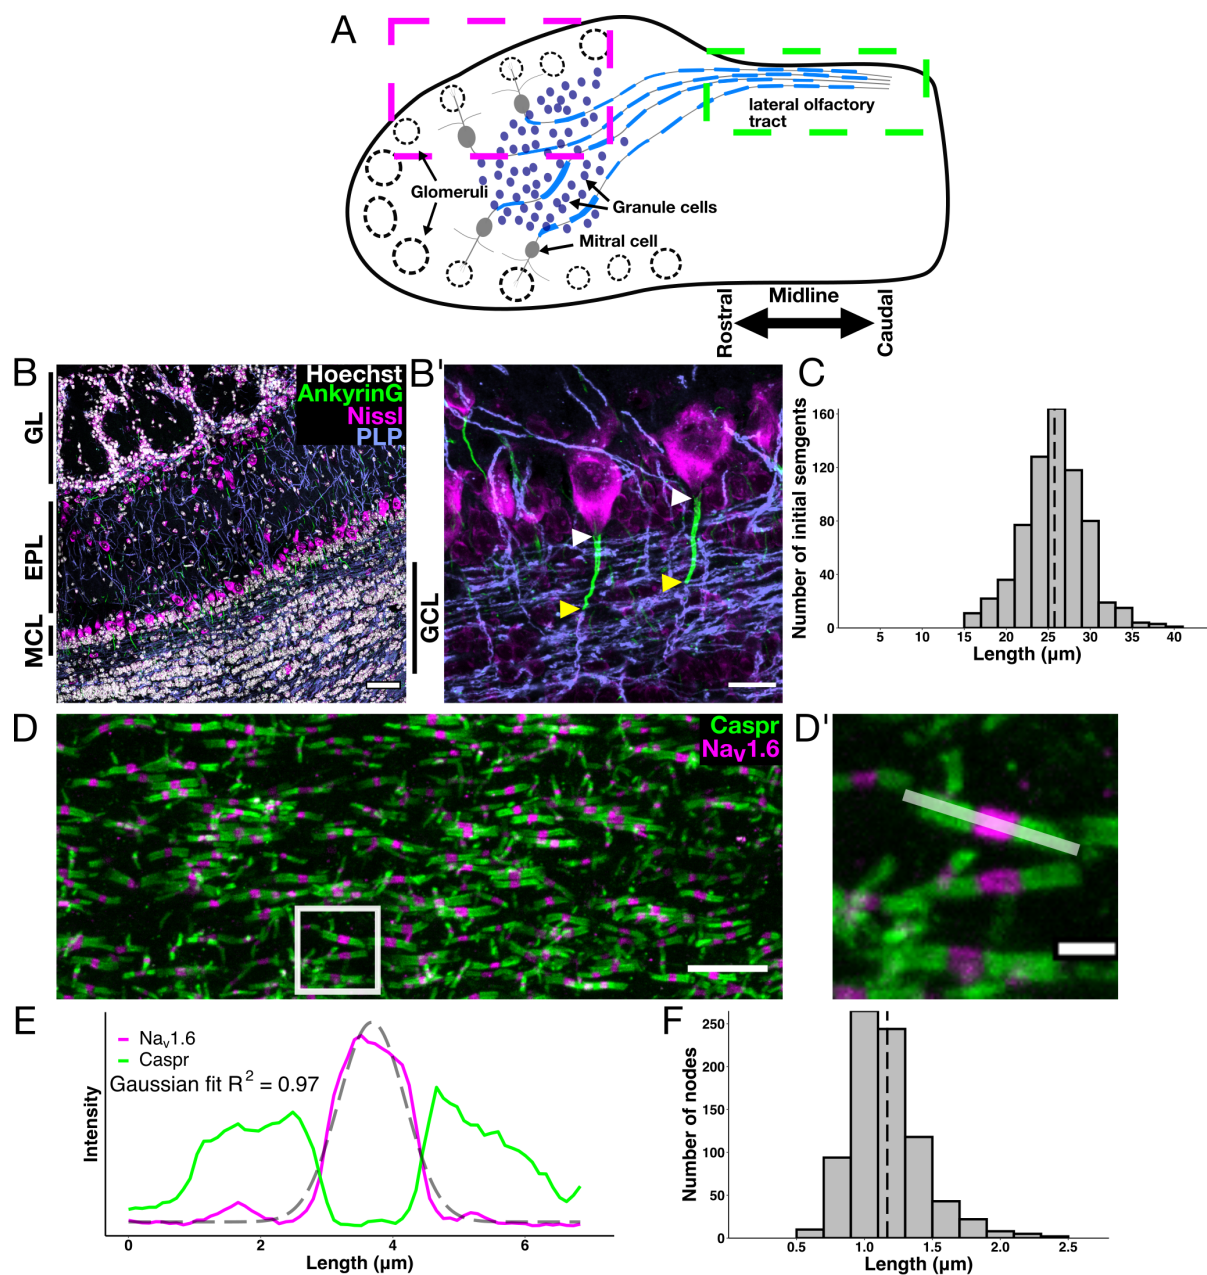

**Figure 1.** Characterization of excitable axonal domains in the olfactory system. **(A)** Diagram of a transverse section of the olfactory bulb (OB) and rostral lateral olfactory tract (LOT). Boxes indicate the areas where measurements were performed for the AIS and nodes of Ranvier. Magenta box **(A)** corresponds to an example region for AIS length measurements **(B and B')**, and the green boxed region **(A)** corresponds to an example region for node of Ranvier measurements **(D, D')**. **(B)** Immunohistochemistry for nuclei (Hoechst, white), the axon initial segment (AIS) (AnkG, green), cell bodies (Nissl, magenta), and myelin (proteolipid protein, PLP, blue). The functional layers of the OB are labeled on the edges of the image (GL = glomerular layer, EPL = external plexiform layer, MCL = mitral cell layer, GCL = granule cell layer). Scale bar in **(B)** is 50 μm. **(B')** Expanded region highlighting Nissl labeling of MC bodies and AnkG+ AISs in the MCL. White arrowheads label the start of MC AISs and yellow arrowhead show the termination. Scale bar in **(B')** is 15 μm. **(C)** Distribution of AIS lengths in the adult OB. Dashed line indicates mean length. **(D)** Nodes of Ranvier in the LOT corresponding to the region highlighted in the green box in **(A)**. Nav1.6 (magenta) marks the excitable nodal region, Caspr (green) marks flanking paranodal junctions. Scale bar in **(D)** is 10 μm. **(D')** Expanded node of Ranvier from white box in **(D)**. Scale bar in **(D')** is 2 μm. **(E)** Fluorescence intensity profile of the node of Ranvier in **(D')**, light white line with a Gaussian fit of Nav1.6 (grey dashed line). The Gaussian fit of Nav1.6 was used to measure node length (see Methods). **(F)** Distribution of node lengths in the LOT. Dashed line indicates mean length.



140 ity and AP fidelity (Chomiak and Hu, 2009; Kim et al., 2013; Etxeberria et al., 2016), we measured  
141 the  $g$ -ratio of myelinated axons in the LOT between 2.45-3.05mm anterior of the bregma suture  
142 (Figure 2D-H). The mean  $g$ -ratio was  $0.751 \pm 0.0549$ , while mean axon diameter was  $1.22 \pm 0.456\mu\text{m}$   
143 (Figure 2F,H) ( $n = 184$  axons from 2 animals).

144

### 145 **Unilateral naris occlusion causes adaptations in mitral cell axon initial segments** 146 **and nodes of Ranvier**

147 The OB is a remarkably plastic structure. New neurons are incorporated into functional circuits in  
148 the OB throughout life (Whitman and Greer, 2007; Yamaguchi et al., 2013; Lazarini et al., 2009),  
149 and the firing patterns of MCs are known to change significantly as an animal learns an olfactory  
150 discrimination task (Losacco et al., 2020; Chu et al., 2016; Friedrich et al., 2004; Doucette et al.,  
151 2011; Lepousez and Lledo, 2013; Gire et al., 2013; Gschwend et al., 2015). Little is known about  
152 whether axonal domains adapt to changing olfactory input in adult animals. To test whether myeli-  
153 nated axons respond to changing olfactory input in adult mice, we performed UNO on P60 mice  
154 for 30 days and measured the length of MC AISs and nodes of Ranvier in the LOT.

155

156 UNO is a model for sensory deprivation in which one naris is surgically closed to block sensory  
157 input. One of the hallmarks of UNO is an activity-dependent decrease in tyrosine hydroxylase (TH)  
158 mRNA and protein expression in a subset of dopaminergic periglomerular cells in the glomerular  
159 layer (GL) (Sawada et al., 2011; Baker et al., 1993). To assess the efficiency of UNO, we measured  
160 the fluorescence intensity of TH in the GL of P60 mice that underwent UNO for 30 days (called  
161 Naris Occlusion) and control animals (cage mate sham surgery, called Control) (Figure 3). Within  
162 Naris Occlusion animals, we noted a significant decrease (~45%) of TH fluorescence intensity in  
163 the Occluded bulb GL compared to the Open bulb GL (paired  $t$ -test,  $t(6) = 9.58$ ,  $p = 7.4e-5$ ,  $n = 7$   
164 animals). Control animals showed no significant difference in TH intensity between Left and Right  
165 bulbs (Figure 3D, paired  $t$ -test,  $t(3) = -0.383$ ,  $p = 0.727$ ,  $n = 4$  animals). We compared the relative in-  
166 tensity (Occluded side / Open side for Naris Occlusion animals, and Left side / Right side for Control  
167 animals) and found that the relative intensity was roughly equal (centers on 1) in Control animals,  
168 but was significantly reduced in Naris Occlusion animals, indicating effective UNO (Figure 3E,  $t$ -test,  
169  $t(7.2) = 6.25$ ,  $p = 0.00038$ ).

170

171 Do MC AISs adapt to changing sensory input following UNO? We measured MC AISs in 3D vol-  
172 umes (as in Figure 1, see Methods) in both 30 day Naris Occlusion animals and Controls. The  
173 distribution of AIS lengths was not significantly different between the Left and Right sides of Con-  
174 trol animals (Kolmogrov-Smirnov (KS) test,  $D = 0.0599$ ,  $p = 0.592$ ,  $n = 678$  AISs from 4 animals), but  
175 in Naris Occlusion animals, the Open and Occluded sides were significantly different (KS test,  $D =$   
176  $0.128$ ,  $p = 3.97e-7$ ,  $n = 1,894$  AISs from 7 animals) (Figure 4A-C).

177 For each group (Control and Naris Occlusion), we summarized the data within animals and per-  
178 formed paired  $t$ -tests (inserts, Figure 4B,C). The Left and Right sides of Control animals were not  
179 significantly different (paired  $t$ -test,  $t(3) = -0.0548$ ,  $p = 0.96$ ,  $n = 4$  animals), but the Open and Oc-  
180 cluded sides of Naris Occlusion animals were significantly different (paired  $t$ -test,  $t(6) = 3.18$ ,  $p =$   
181  $0.019$ ,  $n = 7$  animals).

182

183 Strikingly, Naris Occlusion animals (Open and Occluded sides combined) had a larger range of  
184 AIS lengths than Control animals ( $7.06 - 55.1\mu\text{m}$ ,  $SD = 5.83\mu\text{m}$  for Naris Occlusion,  $15.4 - 39.5\mu\text{m}$ ,  
185  $SD = 3.81\mu\text{m}$  for Control). Indeed, when we compared the variances of the two main distributions  
186 (Control vs. Naris Occlusion), they were significantly different (Fligner-Killeen test  $\chi^2(1) = 59.5$ ,  $p$   
187  $= 1.26e-14$ ). Within the Control group (Left vs. Right), we found no statistically significant differ-  
188 ence in variance (Fligner-Killeen test  $\chi^2(1) = 0.0106$ ,  $p = 0.918$ ), indicating homogeneous variance  
189 between Left and Right sides of Control animals. However, within Naris Occlusion animals (Open

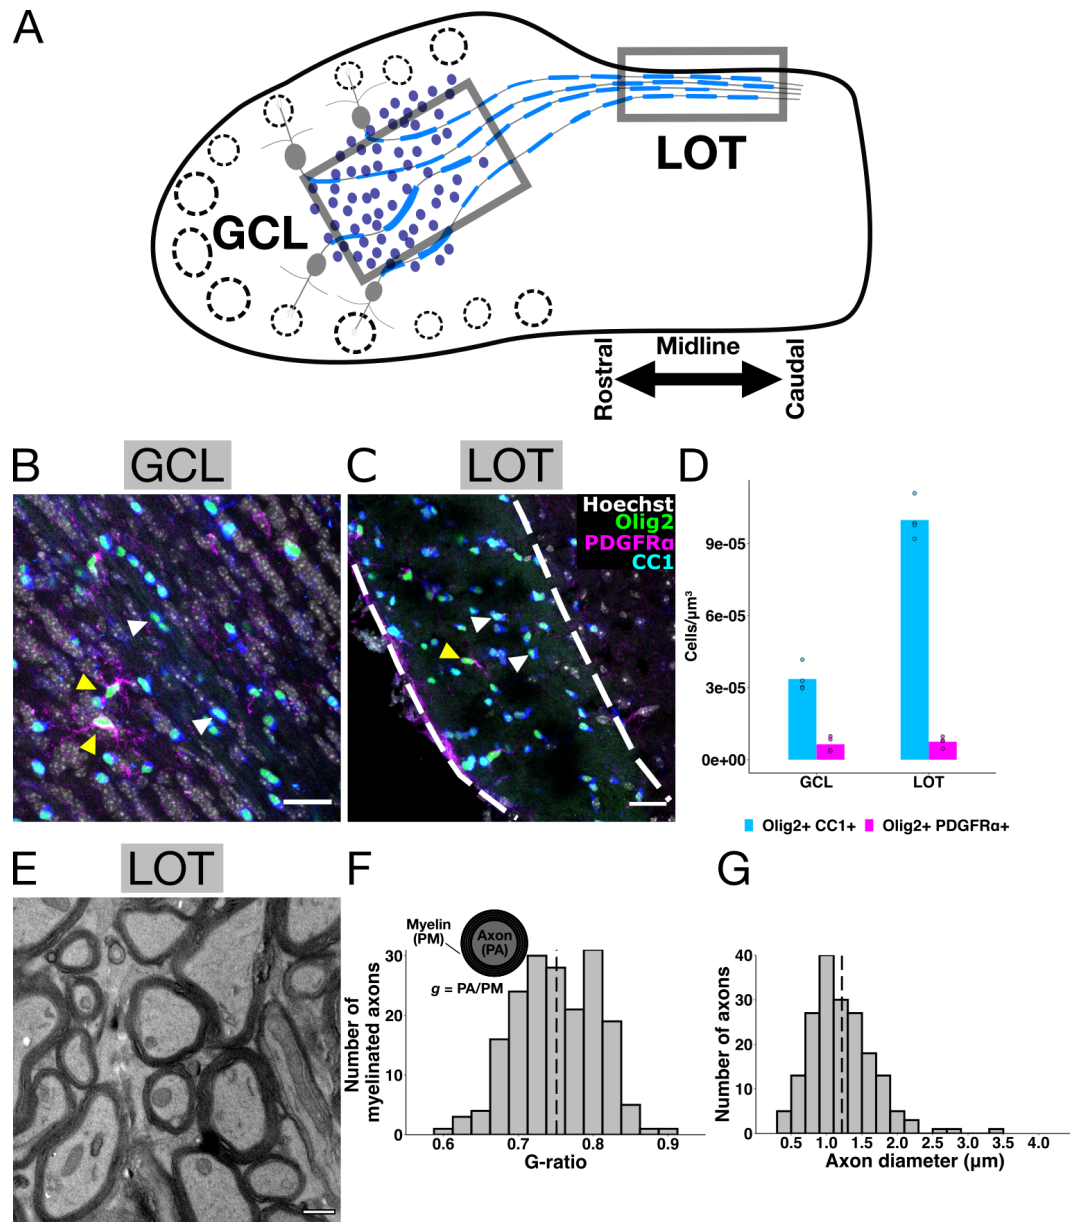

**Figure 2.** Characterization of oligodendrocyte lineage cells and myelin sheaths in the OB and LOT. **(A)** Diagram of a transverse section of the OB and LOT with grey boxes indicating the GCL and LOT. **(B)** Oligodendrocyte lineage cells in the GCL. **(C)** Oligodendrocyte lineage cells in LOT (area between dashed white lines). Yellow arrows indicate oligodendrocyte progenitor cells (OPCs) and white arrows indicate oligodendrocytes. Scale bars in **(B)** and **(C)** are  $25\mu\text{m}$ . **(D)** Oligodendrocyte lineage cell quantification in GCL and LOT. Points indicate individual animals ( $n = 4$  animals) and bars indicate the group means. **(E)** Electron micrograph (EM) image of myelinated axons in a coronal section of LOT. Scale bar in **(E)** is  $0.5\mu\text{m}$ . **(F)** Diagram demonstrating  $g$ -ratio calculations and histogram of  $g$ -ratio distribution in LOT. To calculate  $g$ -ratio, the perimeter of the axon (PA) was divided by the perimeter of the surrounding myelin sheath (PM) to yield  $g$ . Histogram shows distribution of  $g$ -ratios in LOT. Dashed line histogram indicates mean  $g$ -ratio. **(G)** Distribution of axon diameters in LOT. Dashed line indicates mean axon diameter.

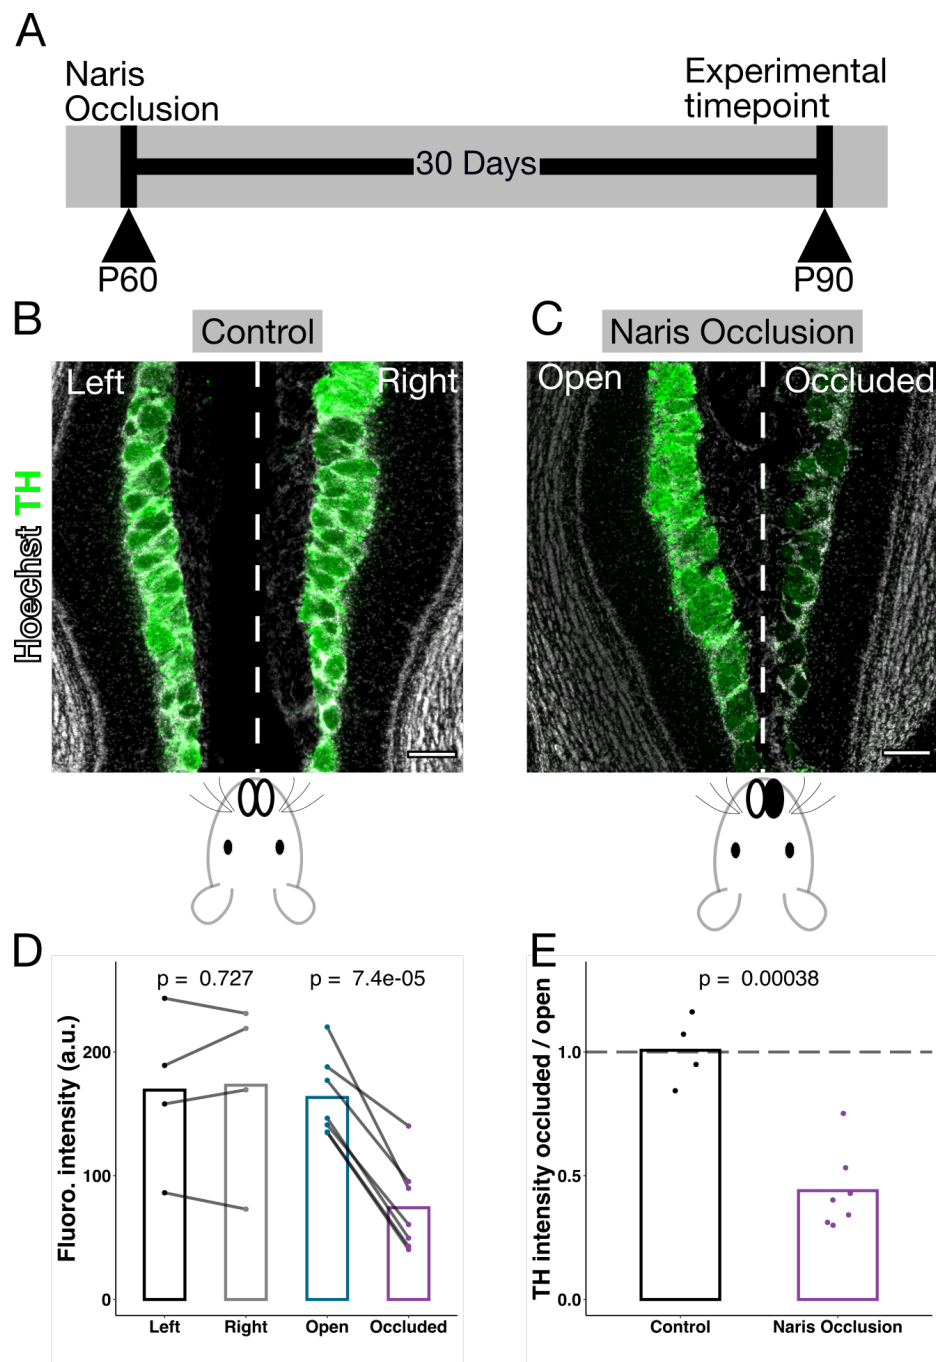

**Figure 3.** Unilateral naris occlusion experimental design. **(A)** Experimental timeline. Postnatal day (P) 60 animals underwent unilateral naris occlusion (UNO) for 30 days and were analyzed at P90. **(B)** Example bilateral horizontal section of OB showing TH immunolabeling in a P90 Control animal. **(C)** Example bilateral horizontal section of OB showing TH immunolabeling in a P90 animal following 30 days UNO (Naris Occlusion). Scale bars in **B** and **C** are 150 $\mu$ m. **(D)** Fluorescence intensity is not significantly different between the Left and Right sides of Control animals (paired *t*-test,  $t(3) = -0.383$ ,  $n = 4$  animals). There is a significant decrease in fluorescence intensity between the Open and Occluded bulbs of Naris Occlusion animals (paired *t*-test,  $t(6) = 9.58$ ,  $n = 7$  animals). Intensity is given in arbitrary units (a.u.). **(E)** Plot showing relative intensity of OBs within Control animals or within Naris Occlusion animals. Naris Occlusion animals have significantly lower relative TH intensity compared to Control animals. Dashed line at 1 indicates equal intensity on either side (Right / Left for Control or Occluded / Open for Naris Occlusion). Relative TH intensity was significantly reduced in Naris Occlusion animals compared to Control (*t*-test,  $t(7.2) = 6.25$ ).

190 vs. Occluded), variance was significantly different (Fligner-Killeen test  $\chi^2(1) = 9.97, p = 0.00159$ ). A  
191 larger variance of AIS lengths in UNO animals could have implications for information encoding  
192 within the OB by increasing the diversity of AP shapes and firing frequencies from MCs (see *Discus-*  
193 *sion*).

194  
195 To further investigate the difference in length distributions between Control and Naris Occlu-  
196 sion animals, we calculated the mean AIS length per animal and bulb. Given the consistency of  
197 AIS lengths in Control animals, we combined the Left and Right bulbs into one group. AIS lengths  
198 from Control bulbs, Open bulbs, and Occluded bulbs were significantly different from one another  
199 (**Figure 4D**, ANOVA,  $F(2,15) = 4.72, p = 0.026$ ). Surprisingly, AISs from Open bulbs were significantly  
200 longer than Control bulbs ( $t$ -test,  $t(8.66) = -2.84$ , False discovery rate corrected [FDR]  $p = 0.03$ , mean  
201 length Open =  $26.9 \pm 1.02\mu\text{m}$ , mean length Control =  $25.4 \pm 1.04\mu\text{m}$ ), and Occluded bulbs ( $t$ -test,  
202  $t(11.6) = -2.69$ , FDR  $p = 0.03$ , mean length Open =  $26.9 \pm 1.02\mu\text{m}$ , mean length Occluded =  $25.2 \pm$   
203  $1.24\mu\text{m}$ ). Interestingly, Occluded bulbs were not significantly different from Control bulbs ( $t$ -test  
204  $t(9) = 0.322$ , FDR  $p = 0.75$ , mean length Occluded =  $25.2 \pm 1.24\mu\text{m}$ , mean length Control =  $25.4 \pm$   
205  $1.04\mu\text{m}$ ).

206  
207 Together, our data indicates that 30 days of UNO causes both a significant increase in MC AIS  
208 length in the Open bulb compared to Control and Occluded bulbs, and increases the variance of  
209 the entire distribution of AIS sizes in UNO animals relative to Controls.

210  
211 Changes in (or loss of) nodes of Ranvier are predicted to have significant effects on conduction  
212 velocity and AP reliability (*Hamada et al., 2017; Arancibia-Cárcamo et al., 2017; Kim et al., 2013*),  
213 both of which are vital for olfactory sensory processing in downstream brain regions such as the  
214 piriform cortex (*Franks and Isaacson, 2006; Luna and Schoppa, 2008; Bolding and Franks, 2018*).  
215 To investigate whether nodes of Ranvier adapt to sensory deprivation in the olfactory system, we  
216 measured the length of nodes (as described in **Figure 1D', E**; see *Methods*) in Naris Occlusion ani-  
217 mals and Controls. The distribution of node of Ranvier lengths between the Left and Right sides of  
218 Control animals was not significantly different (KS test,  $D = 0.0773, p = 0.179, n = 811$  nodes from  
219 4 animals). The distribution of node lengths between the Open and Occluded sides of Naris Oc-  
220 clusion animals was also not significantly different (KS test,  $D = 0.0508, p = 0.338, n = 1,409$  nodes  
221 from 4 animals). Similarly, when the data was summarized by animal, we found no significant dif-  
222 ferences (**Figure 4**, inserts F and G, Control paired  $t$ -test,  $t(3) = 0.227, p = 0.835$ , Naris Occlusion  
223 paired  $t$ -test,  $t(3) = 0.131, p = 0.904$ ).

224  
225 Since between bulb distributions (Left vs. Right and Open vs. Occluded) were not different in  
226 either group, we next compared the distribution of node of Ranvier lengths from Control animals  
227 to Naris Occlusion animals (**Figure 4H**). We found that the distribution of node lengths was signifi-  
228 cantly different between the Control and Naris Occlusion animals (KS test,  $D = 0.137, p = 9.24e-9$ ).  
229 However, when we directly compared the mean values per animal, values were not significant ( $t$ -  
230 test,  $t(3.38) = 0.56, p = 0.611$  [**Figure 4H** insert]). In the case of nodes of Ranvier, we found no  
231 evidence of differing variances between the Left and Right sides of Control animals (Fligner-Killeen  
232 tests,  $\chi^2(1) = 1.15, p = 0.283$ ), the Open and Occluded sides of Naris Occlusion animals (Fligner-  
233 Killeen tests,  $\chi^2(1) = 0.564, p = 0.453$ ), or Naris Occlusion vs. Control (Fligner-Killeen tests,  $\chi^2(1)$   
234  $= 2.95, p = 0.086$ ). The lack of changes *within* animals but difference *between* treatment groups  
235 points to a system level adaptation to Naris Occlusion, affecting both Open and Occluded sides to  
236 a similar degree.

237  
238 Together, these data point to a system-level adaptation in node of Ranvier and AIS length dis-  
239 tributions following Naris Occlusion. Nodes of Ranvier are formed from axon-myelin interactions  
240 (*Susuki et al., 2013*), so we next investigated whether oligodendrocyte lineage cells or the myelin



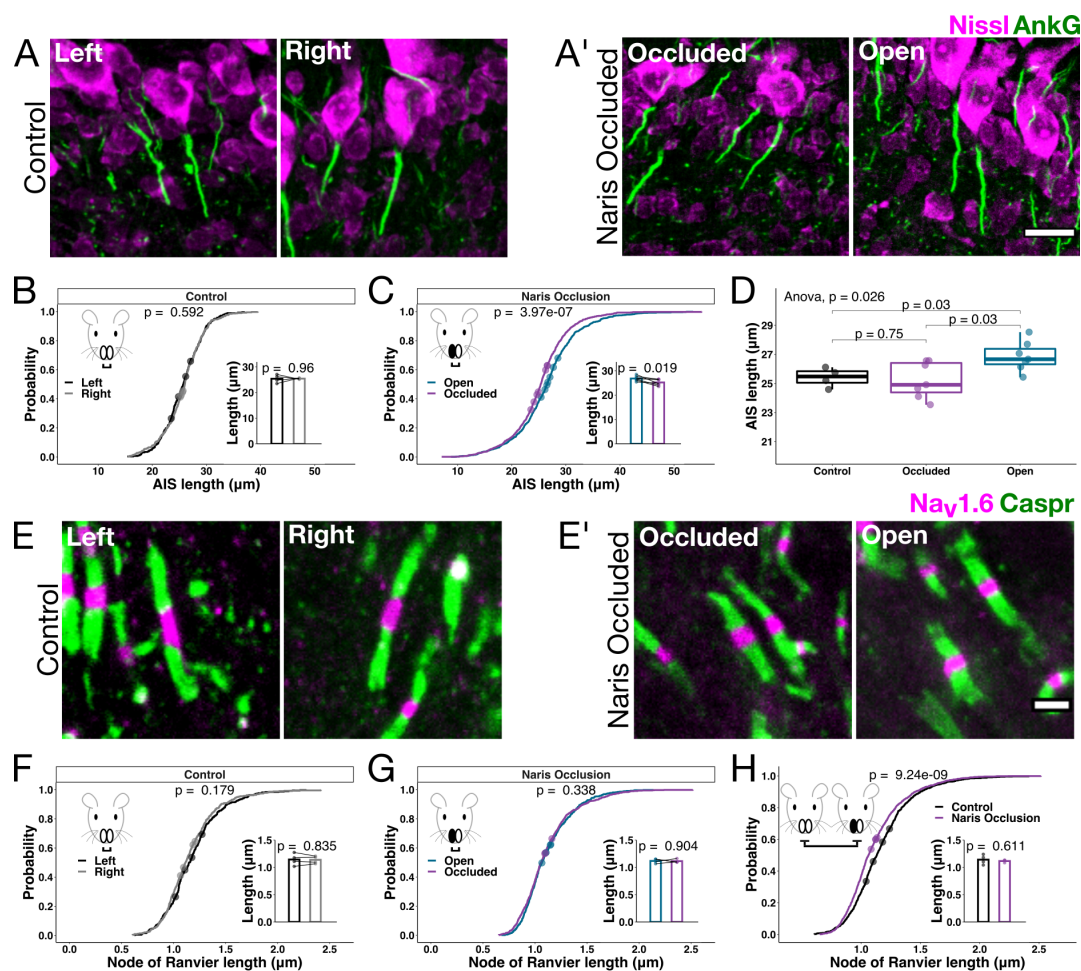

**Figure 4.** MC axonal adaptations following 30 days of UNO. **(A)** Example MC AISs from the left and right OB of Control animals. **(A')** Example MC AISs from the Occluded and Open OB from UNO animals. Scale bar in **(A')** and **(A)** and is 15μm. **(B)** Empirical distributions comparing the AIS lengths from the left and right OBs of Control animals. *P*-value is from a KS-test comparing the distributions (KS-test  $D = 0.0599$ ,  $n = 678$  AISs from 4 animals). Points along the empirical distribution show the mean length of each OB's AISs mapped to the probability within the respective distribution. Insert shows within-animal comparison of mean AIS lengths. Points in the bar plot inserts represent the mean AIS length from an animal's left or right OB, and the bars represent the mean value for that group (paired *t*-test,  $t(3) = -0.0548$ ).  $N = 678$  AISs from 4 animals. **(C)** Similar to **(B)** but comparing the empirical distribution of AISs from Open and Occluded OBs from UNO animals (KS-test  $D = 0.128$ ,  $n = 1,894$  AISs from 7 animals). Insert shows within-animal comparison of mean AIS lengths in Open vs. Occluded bulbs from Naris Occlusion animals (as in **(B)**, paired *t*-test,  $t(6) = 3.18$ ). **(D)** Mean AIS lengths calculated on a per-animal OB basis (Control combines the left and right OBs from Control animals, while Naris Occlusion Occluded and Open OBs were kept separate). AIS lengths from Control OBs were not significantly different from AIS lengths from Occluded OBs (*t*-test  $t(9) = 0.32$ ), but AISs from Open OBs were significantly longer than both Control (*t*-test,  $t(8.66) = -2.84$ ) and Occluded OBs (*t*-test,  $t(11.6) = -2.69$ ). False discovery rate (FDR) corrected *p* values are shown in plot. **(E)** Example nodes of Ranvier in the LOT from the Left and Right sides of Control animals. **(E')** Similar to **(E)**, but in UNO animals. Scale bar in **(E')** and **(E)** and is 2μm. **(F)** Empirical distributions comparing node of Ranvier lengths from the left and right LOTs of Control animals. *P*-value is from a KS-test comparing node of Ranvier length distributions (KS-test  $D = 0.0773$ ,  $n = 811$  nodes from 4 animals), displayed similar to **(B-C)**. Insert shows within-animal comparison of mean node of Ranvier lengths. Points represent the mean node of Ranvier length from an animal's left or right LOT, and the bars in the insert represent the mean value for that side (paired *t*-test,  $t(3) = 0.227$ ). **(G)** Similar to **(F)**, but comparing node of Ranvier lengths from the Open and Occluded LOTs of Naris Occlusion animals (KS-test  $D = 0.0508$ ,  $n = 1,409$  nodes from 4 animals). Insert similar to **(F)**, showing within-animal comparison between side comparison of mean node of Ranvier lengths (paired *t*-test,  $t(3) = 0.131$ ). **(H)** Comparison of node of Ranvier length distributions for Control and Naris Occlusion. *P*-value is from a KS-test comparing the node of Ranvier lengths for LOTs from Control animals or Naris Occlusion animals (KS-test  $D = 0.137$ ). Points along the distribution show individual animal means mapped to the distribution. Insert shows a per-animal comparison of mean node length (Control vs. Naris Occlusion). The points represent per-animal means and bars represent the group means (*t*-test,  $t(3.38) = 0.56$ ).

241 sheath adapt to adult UNO.

242

### 243 **Unilateral naris occlusion does not affect oligodendrocyte lineage cells or the myelin** 244 **sheath**

245 Do oligodendrocyte lineage cells and the myelin sheath respond to UNO in adults? We quantified  
246 OPC and oligodendrocyte density in Control and Naris Occlusion animals in the GCL and LOT after  
247 30 days of UNO (**Figure 5**). We found no significant difference between the Left and Right sides of  
248 Control animals in the density of GCL oligodendrocytes (paired *t*-test,  $t(3) = -0.364$ ,  $p = 0.74$ ,  $n = 4$  ani-  
249 mals) or GCL OPCs (paired *t*-test,  $t(3) = 1.53$ ,  $p = 0.223$ ,  $n = 4$  animals). We also found no significant  
250 difference between the Open and Occluded sides of Naris Occlusion animals in GCL oligodendro-  
251 cytes (paired *t*-test,  $t(3) = 2.43$ ,  $p = 0.0938$ ,  $n = 4$  animals) or GCL OPCs (paired *t*-test,  $t(3) = -0.516$ ,  $p$   
252  $= 0.642$ ,  $n = 4$  animals), although three of the four animals had a reduction in oligodendrocytes in  
253 Occluded bulbs (**Figure 5A'**). There was no significant difference between the main groups (Control  
254 and Naris Occlusion) in GCL oligodendrocytes (*t*-test,  $t(5.41) = 0.192$ ,  $p = 0.855$ ,  $n = 8$  animals) or  
255 GCL OPCs (**Figure 5**, row A, *t*-test,  $t(5.22) = -0.668$ ,  $p = 0.533$ ,  $n = 4$  animals/group).

256

257 Similarly, in the LOT, we found no significant differences between the Left and Right sides of  
258 Control animals in LOT oligodendrocytes (paired *t*-test,  $t(3) = -0.995$ ,  $p = 0.393$ ,  $n = 4$  animals) or  
259 OPCs (paired *t*-test,  $t(3) = 0.085$ ,  $p = 0.937$ ,  $n = 4$  animals). There were no significant differences  
260 between the Open and Occluded sides of Naris Occlusion animals in LOT oligodendrocytes (paired  
261 *t*-test,  $t(3) = -0.606$ ,  $p = 0.588$ ,  $n = 4$  animals) or OPCs (paired *t*-test,  $t(3) = -2.05$ ,  $p = 0.132$ ,  $n = 4$   
262 animals). There was also no significant difference between the main groups (Control and Naris  
263 Occlusion) in LOT oligodendrocytes (**Figure 5**, row B, *t*-test,  $t(4.45) = -1.86$ ,  $p = 0.13$ ,  $n = 8$  animals)  
264 or OPCs (*t*-test,  $t(5.87) = -0.866$ ,  $p = 0.421$ ,  $n = 4$  animals/group).

265

266 While we found no change in the density of oligodendrocyte lineage cells, myelin sheaths them-  
267 selves can undergo remodeling by pre-existing oligodendrocytes (**Auer et al., 2018**). To determine  
268 whether myelin sheaths changed in response to UNO, we quantified myelinated axons in the LOT  
269 of Naris Occlusion and Control animals by measuring the *g*-ratio (see **Methods** and **Figure 2F**). We  
270 noted no significant differences between the Left and Right LOTs of Control animals (*t*-test,  $t(179) =$   
271  $-1.85$ ,  $p = 0.067$ ,  $n = 184$  axons) or between the Open and Occluded sides of Naris Occlusion animals  
272 (*t*-test,  $t(211) = -0.591$ ,  $p = 0.555$ ,  $n = 305$  axons). The main groups (Control and Naris Occlusion)  
273 were also not significantly different from one another (*t*-test,  $t(388) = -1.32$ ,  $p = 0.19$ ,  $n = 489$  axons)  
274 (**Figure 5**, row C).

275

276 Together, we found no evidence of changes in oligodendrocyte lineage cells or myelinated ax-  
277 ons in response to 30 days of UNO in adult animals, despite the system wide changes in nodes of  
278 Ranvier. This indicates that nodes of Ranvier may change independently of the differentiation and  
279 myelination of new OPCs or pre-existing myelin (see **Discussion**).

280

### 281 **Mitral cell firing properties change following unilateral naris occlusion**

282 Sensory deprivation and enrichment can have dramatic effects on axon morphology and neuronal  
283 firing properties (**Jamann et al., 2021; Kuba et al., 2010; Evans et al., 2015**). We have described  
284 subtle length changes in the AIS and nodes of Ranvier following UNO, but do these changes affect  
285 MC physiology?

286

287 To assess MC physiology, we performed whole cell current clamp recordings on UNO and Con-  
288 trol mice. Cells were held at  $-60$ mV for all experiments. Membrane resting potential was not signif-  
289 icantly different between the Control and Naris Occlusion groups (Control  $-52.9 \pm 0.26$ mV,  $n = 23$

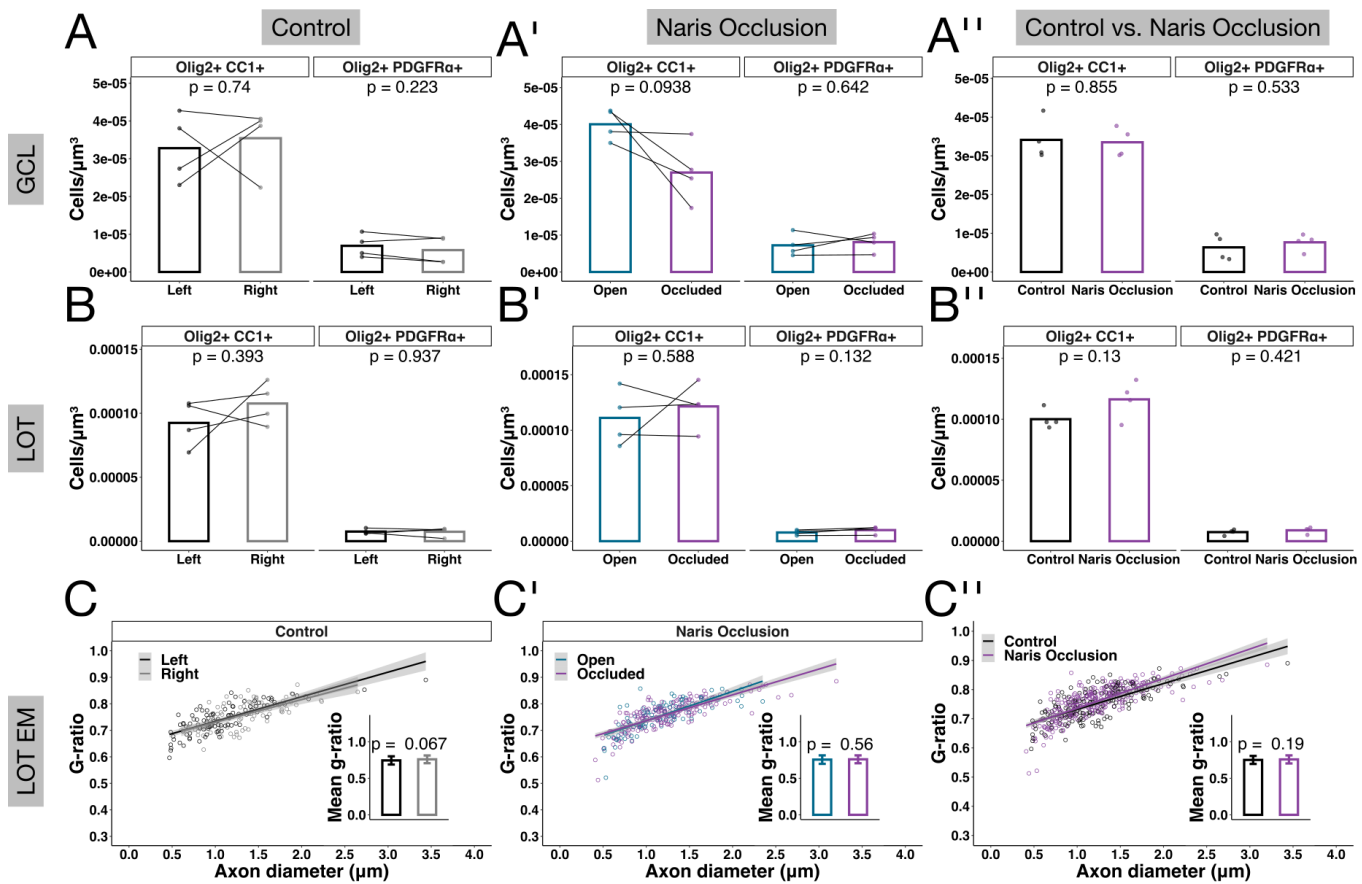

**Figure 5.** Oligodendrocyte lineage cells and myelinated axons after 30 days of UNO. **(A)** Comparison of GCL oligodendrocyte lineage cell density in the Left and Right bulbs of Control animals. We noted no significant differences between the Left and Right bulbs of Control animals in oligodendrocytes (paired *t*-test,  $t(3) = -0.364$ ) or OPCs (paired *t*-test,  $t(3) = 1.53$ ). Points represent within bulb means for each animal, *p*-values represent paired *t*-tests,  $n = 4$  animals. **(A')** Comparison of GCL oligodendrocyte lineage cell density in the Open and Occluded bulbs of Naris Occlusion animals. We found no significant difference in cell density between the Open or Occluded bulbs in oligodendrocytes (paired *t*-test,  $t(3) = 2.43$ ) or OPCs (paired *t*-test,  $t(3) = 0.516$ ). Points represent within bulb means for each animal, *p*-values represent paired *t*-tests,  $n = 4$  animals. **(A'')** Comparison of LOT oligodendrocyte lineage cell density in Naris Occlusion vs. Control animals. Taken as a group, Control and Naris Occlusion animals had similar numbers of oligodendrocytes (*t*-test,  $t(5.41) = 0.192$ ) and OPCs (*t*-test,  $t(5.22) = -0.668$ ). Points represent per-animal means, *p*-values represent *t*-tests,  $n = 8$  animals. **(B)** Comparison of LOT oligodendrocyte lineage cell density in the Left and Right bulbs of Control animals. We found no significant differences in oligodendrocyte (paired *t*-test,  $t(3) = -0.995$ ) or OPC density (paired *t*-test,  $t(3) = 0.085$ ) in LOT, quantification similar to **(A)**,  $n = 4$  animals. **(B')** Comparison of LOT oligodendrocyte lineage cell density in Open and Occluded bulbs of Naris Occlusion animals. We found no significant differences in oligodendrocyte (paired *t*-test,  $t(3) = 0.606$ ) or OPC density (paired *t*-test,  $t(3) = -2.05$ ) in LOT, quantification similar to **(A')**,  $n = 4$  animals. **(B'')** Comparison of LOT oligodendrocyte lineage cell density in Naris Occlusion vs. Control animals. Taken as a group, there was again no significant difference in oligodendrocyte lineage cell density between Naris Occlusion and Control animals (oligodendrocytes *t*-test,  $t(4.45) = -1.86$ , OPCs *t*-test,  $t(5.87) = 0.806$ ). Quantification was similar to **(A'')**,  $n = 8$  animals. **(C)** Comparison of myelinated axons in the left and right LOTs of Control animals. There was no significant difference in mean *g*-ratio between the left and right sides of Control animals (*t*-test,  $t(179) = 1.85$ ,  $n = 184$  axons). Points in scatter plot represent individual axons, error bars in bar plot insert represent per-group standard deviation (SD). **(C')** Comparison of myelinated axons in the Open and Occluded LOTs of Naris Occlusion animals. There was no significant difference in mean *g*-ratio between the Open and Occluded sides of Naris Occlusion animals (*t*-test,  $t(211) = -0.591$ ). Data presented as in **(C)**  $n = 305$  axons. **(C'')** Comparison of myelinated axons in Naris Occlusion vs. Control animals. Treated as a group, there was no significant difference between Naris Occlusion and Control animals (*t*-test,  $t(388) = -1.32$ ).

290 cells, Naris Occlusion  $-52.5 \pm 0.423\text{mV}$ ,  $n = 19$  cells,  $t$ -test,  $t(32.3) = -0.155$ ,  $p = 0.878$ , presented as  
291 mean  $\pm$  standard error of the mean [SEM]), or between the Control, Open, and Occluded groups  
292 (Control  $-52.9 \pm 0.256\text{mV}$ ,  $n = 23$  cells, Occluded  $= -52.8 \pm 0.76\text{mV}$ ,  $n = 12$  cells, Open  $= -52 \pm 0.915\text{mV}$ ,  
293  $n = 7$  cells, ANOVA,  $F(2,39) = 0.0436$ ,  $p = 0.957$ , presented as mean  $\pm$  SEM). MCs are involved in com-  
294 plex circuits and receive both excitatory and inhibitory inputs which affects firing patterns and  
295 synchrony (Schoppa and Westbrook, 2001; Egger and Urban, 2006; Fukunaga et al., 2014). To iso-  
296 late MCs from OB circuits and measure intrinsic firing patterns, we performed all recordings in the  
297 presence of the glutamatergic inhibitors 6,7-dinitroquinoxaline-2,3-dione (DNQX,  $10\mu\text{M}$ ), 2-amino-  
298 5-phosphonopentanoic acid (APV,  $50\mu\text{M}$ ), and the GABAergic inhibitor gabazine ( $5\mu\text{M}$ ). MCs have  
299 large, complex dendrites and axons which can easily be damaged during the slicing procedure. To  
300 ensure damaged MCs were not influencing recordings, we performed a subset of recordings with  
301 biocytin in the patch pipette ( $\sim 2\text{mg/ml}$ ), then fixed and immunolabeled the slices for AISs after  
302 recording (Figure 6A, A'; see Methods). Our data indicate that the majority of recorded cells con-  
303 tained a discernible, AnkG+ AIS and axon (89%, Figure 6A, white arrow), and a full primary dendrite  
304 innervating a glomerulus (72%, Figure 6A, yellow arrow,  $n = 18$  cells, 5 Control, 13 Naris Occlusion).

305  
306 MCs are diverse, both in terms of morphology and physiology, displaying both bursting and  
307 regular spiking patterns in response to current injections (Padmanabhan and Urban, 2014, 2010;  
308 Fadool et al., 2011; Chen and Shepherd, 1997). We first investigated the spiking behavior of MCs  
309 in response to a series of current injections from 0-500pA with a step size of 25pA (Figure 6B). To  
310 test whether spiking patterns were different, we fit generalized linear models (GLMs) to the spike  
311 frequencies. The main model was of the form:

$$Y = \beta_0 + \beta_C \times \text{Current} + \beta_G \times \text{Group} + \beta_I \times (\text{Current} * \text{Group}) + \epsilon$$

313

314

315 Where  $Y$  is the dependent variable (in this case the number of spikes),  $\beta_0$  is the intercept,  $\beta_C$  is  
316 the injected *Current*,  $\beta_G$  is *Group*, and includes Control, Open, or Occluded,  $\beta_I$  are the *Current\*Group*  
317 interaction terms between *Current* and *Group*, and  $\epsilon$  is the error term. We used a Gaussian family  
318 link function when fitting the GLMs. To compute the significance of the main model, we used an  
319 Analysis of Deviance table to compare it to a GLM containing only current as the independent vari-  
320 able ( $Y = \beta_0 + \beta_C \times \text{Current} + \epsilon$ ).

321

322 For MC spiking, the main model was significant compared to the current-only model (Figure 6B,  
323  $F = 8.57$ ,  $p = 8.7\text{e-}7$ ). In the main model, we found that firing rates increased significantly as a  
324 function of current (GLM,  $t = 20.5$ ,  $p < 2\text{e-}16$ ). Additionally, the interactions between current and  
325 Occluded, and current and Open had a significant effect on firing rates vs. Control (GLM, Cur-  
326 rent\*Occluded interaction  $t = -2.91$ ,  $p = 0.00375$ , Current\*Open interaction  $t = -3.39$ ,  $p = 0.000721$ ,  
327  $n$  cells = 23 Control, 13 Occluded, and 7 Open; for all GLM results, the reported  $t$  and  $p$  values are  
328 rounded to 3 significant figures in the text). See Table 1 for the model summary, and supplemental  
329 data set 1 for pairwise comparisons between groups.

330

331 Previous computational modeling and experimental studies have indicated that spike timing  
332 (measured via inter-spike interval or onset threshold) is sensitive to minor changes in AIS length  
333 (Evans et al., 2015; Baalman et al., 2013; Jamann et al., 2021). Furthermore, voltage gated potas-  
334 sium channels ( $K_v$ ), known to be present at the AIS, strongly influence spiking diversity, AP shape,  
335 and AP reliability (Padmanabhan and Urban, 2014; Kole et al., 2007; Debanne, 2004). To test  
336 whether the MC morphological adaptations were reflected in spiking patterns, we next measured  
337 the mean inter-spike interval at each current step. We found that the main model was not signif-



**Table 1.** Spike count GLM summary.

| Coefficients     | Estimate  | Std. Error | t-value | p-value  |
|------------------|-----------|------------|---------|----------|
| (Intercept)      | 7.201534  | 2.629970   | 2.738   | 0.006299 |
| Current          | 0.184177  | 0.008999   | 20.467  | < 2e-16  |
| Occluded         | 5.614372  | 4.376535   | 1.283   | 0.199881 |
| Open             | 4.048827  | 5.444556   | 0.744   | 0.457285 |
| Current*Occluded | -0.043524 | 0.014975   | -2.906  | 0.003745 |
| Current*Open     | -0.063215 | 0.018629   | -3.393  | 0.000721 |

338 icantly different from the current-only model (**Figure 6C**,  $F = 0.848$ ,  $p = 0.495$ ). Only current was  
 339 significant in the main model, with inter-spike interval decreasing as a function of increasing cur-  
 340 rent (GLM,  $t = -10.5$ ,  $p < 2e-16$ ). There were no significant interactions between any group and  
 341 current compared to Control (see Table 2 for the model summary, and supplemental data set 2  
 342 for pairwise comparisons between groups;  $n$  cells = 23 Control, 13 Occluded, and 7 Open).  
 343

**Table 2.** Inter-spike interval GLM summary.

| Coefficients     | Estimate   | Std. Error | t-value | p-value |
|------------------|------------|------------|---------|---------|
| (Intercept)      | 34.0740762 | 1.7331867  | 19.660  | <2e-16  |
| Current          | -0.0561567 | 0.0053619  | -10.473 | <2e-16  |
| Open             | -6.2233137 | 4.1252974  | -1.509  | 0.1316  |
| Occluded         | 0.9664817  | 2.9468501  | 0.328   | 0.7430  |
| Current*Open     | 0.0209516  | 0.0125863  | 1.665   | 0.0962  |
| Current*Occluded | -0.0009693 | 0.0092304  | -0.105  | 0.9164  |

344 4-Aminopyridine (4AP) sensitive voltage gated potassium channels are implicated in bursting/spiking  
 345 variability in MCs (**Balu et al., 2004; Padmanabhan and Urban, 2014**). To test whether MCs had al-  
 346 tered spiking variability, we calculated the coefficient of variation (CV), a ratio of the SD / mean  
 347 for inter-spike interval (**Padmanabhan and Urban, 2014, 2010**). The main model of inter-spike in-  
 348 terval CV was significantly different from the current-only model (**Figure 6D**,  $F = 3.27$ ,  $p = 0.0114$ ).  
 349 Inter-spike interval CV decreased significantly as a function of increasing current (GLM,  $t = -3.28$ ,  $p$   
 350  $= 0.0011$ ), and the Open group had significantly lower CV than Control (GLM,  $t = -2.79$ ,  $p = 0.00541$ ;  
 351 see Table 3 for model summary, and supplemental data set 3 for pairwise comparisons between  
 352 groups;  $n$  cells = 23 Control, 13 Occluded, and 7 Open).  
 353

**Table 3.** Inter-spike interval coefficient of variation GLM summary.

| Coefficients     | Estimate   | Std. Error | t-value | p-value |
|------------------|------------|------------|---------|---------|
| (Intercept)      | 0.6009139  | 0.0665446  | 9.030   | < 2e-16 |
| current          | -0.0006841 | 0.0002087  | -3.278  | 0.00110 |
| Open             | -0.3988833 | 0.1429577  | -2.790  | 0.00541 |
| Occluded         | -0.1390394 | 0.1107063  | -1.256  | 0.20955 |
| Current*Open     | 0.0007541  | 0.0004433  | 1.701   | 0.08940 |
| Current*Occluded | 0.0004301  | 0.0003510  | 1.225   | 0.22088 |

354 We next investigated the kinetics of individual APs in the Control, Open, and Occluded groups.  
 355 We extracted the first AP from spike trains in current steps from 50pA-500pA (leaving out the lower  
 356 current steps where few spikes were evoked) to measure AP kinetics. We again fit GLMs to com-  
 357 pare relationships.

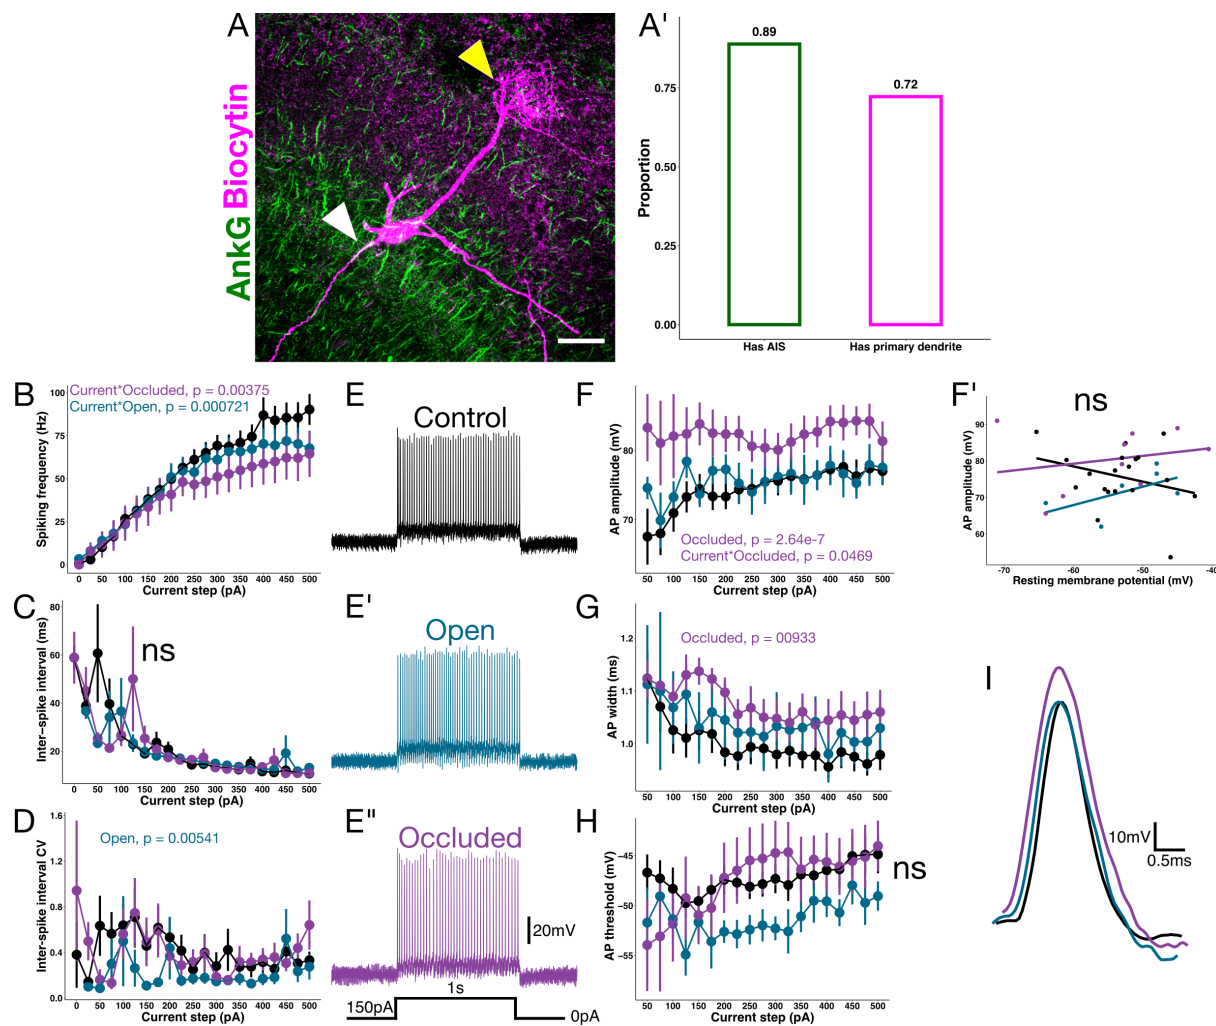

**Figure 6.** MC spiking and Action potentials (APs) adapt to UNO. **(A)** Example of a MC filled with biocytin (magenta) and immunolabeled for the AIS (AnkG, green). White arrowhead indicates the cell's AIS, and the yellow arrowhead indicates the primary dendrite innervating a glomerulus. Scale bar is 25 $\mu$ m. **(A')** Quantification of structural features of a subset of MCs that were filled and immunolabeled ( $n = 18$  cells, 5 Control, 13 Naris Occlusion). 89% of labeled cells had an identifiable AIS, and 72% of cells had an identifiable primary dendrite, indicating that damaged cells likely did not skew results. **(B)** MC spiking frequency across 25pA current steps from 0-500pA. There was a significant interaction between current and Occluded (GLM, Current\*Occluded  $t = -2.91$ ,  $p = 0.00375$ ), and current and Open cells vs. Control (GLM, Current\*Open,  $t = -3.39$ ,  $p = 0.000721$ ).  $P$  values for the significant interactions are shown on the plot. **(C)** Inter-spike interval time for current steps, similar to **(B)**. The main model was not significantly different from the current-only model, indicating Group had no significant effect on the overall inter-spike interval. **(D)** Plot of coefficient of variation (CV) for inter-spike interval. The Open group had significantly lower CV than control ( $t = -2.79$ ,  $p = 0.00541$ ).  $P$  value for the Open term is shown on the plot. **(E)** Example current clamp trace from a Control MC in response to a 150pA 1s current injection. **(E')** Example current clamp trace from an Open MC in response to a 150pA 1s current injection. **(E'')** Example current clamp trace from an Occluded MC in response to a 150pA 1s current injection. **(F)** Plot of AP amplitude across current steps. APs from Occluded MCs had significantly larger amplitudes compared to Control ( $t = 4.27$ ,  $p = 2.23e-5$ ). The Current\*Occluded interaction also had a significant effect on AP amplitude ( $t = -1.99$ ,  $p = 0.0469$ ).  $P$  values for the significant terms are shown on the plot. **(F')** Plot of AP amplitude and resting membrane potential at a 150pA step for a subset of cells. There was no significant correlation between amplitude and resting membrane potential for any of the groups in the membrane potential range observed (Pearson's product-moment correlation, Control,  $t(17) = -1.22$ ,  $p = 0.238$ ,  $n = 18$  cells, Open  $t(4) = 1.39$ ,  $p = 0.236$ ,  $n = 5$  cells, Occluded  $t(7) = 0.626$ ,  $p = 0.551$ ,  $n = 8$  cells). **(G)** Plot of AP width in response to current steps. APs from Occluded bulb MCs were significantly wider than Control (GLM,  $t = 2.61$ ,  $p = 0.00933$ ).  $P$  value for the Occluded term shown on the plot. **(H)** Plot of AP threshold in response to current steps. Open bulb MCs had only marginally lower thresholds than Control (GLM,  $t = -1.92$ ,  $p = 0.0557$ ), but the effect was not significant at  $\alpha = 0.05$ . **(I)** Example traces of single action potentials from a Control bulb MC (black), Open bulb MC (blue), and an Occluded bulb MC (magenta) in response to a 150pA current step.  $N$  cells = 23 Control, 13 Occluded, and 7 Open for all experiments unless otherwise noted. All plots are mean  $\pm$  standard error of the mean.

358

359 The main model for AP amplitude (measured from threshold voltage to peak voltage) was sig-  
 360 nificantly different from the current-only model (**Figure 6F**,  $F = 21.9$ ,  $p < 2.2e-16$ ). AP amplitude  
 361 increased significantly as a function of increasing current in the main model (GLM,  $t = 4.27$ ,  $p =$   
 362  $2.23e-5$ ). APs from Occluded bulb MCs had significantly larger amplitudes than Controls (GLM,  $t =$   
 363  $5.21$ ,  $p = 2.64e-07$ ). There was also a significant interaction between Current and Occluded vs.  
 364 Control (GLM, Current\*Occluded,  $t = -1.99$ ,  $p = 0.0469$ ). These results are consistent with previous  
 365 sensory deprivation studies in the chick auditory brainstem (**Kuba et al., 2010**). See Table 4 for the  
 366 model summary and supplemental data set 4 for pairwise comparisons,  $n$  cells = 23 Control, 13  
 367 Occluded, and 7 Open. To control for different resting potentials possibly affecting AP amplitude,  
 368 we plotted cell resting potential vs. amplitude for a subset of cells in each group. There was no  
 369 significant correlation between amplitude and resting membrane potential for any of the groups in  
 370 the membrane potential range observed (**Figure 6F'**, Pearson's product-moment correlation, Con-  
 371 trol  $t(17) = -1.22$ ,  $p = 0.238$ ,  $n = 18$  cells, Open  $t(4) = 1.39$ ,  $p = 0.236$ ,  $n = 5$  cells, Occluded  $t(7) = 0.626$ ,  
 372  $p = 0.551$   $n = 8$  cells), which is consistent with previous results (**Balu et al., 2004**).

373

**Table 4.** AP amplitude GLM summary.

| Coefficients     | Estimate  | Std. Error | t-value | p-value  |
|------------------|-----------|------------|---------|----------|
| (Intercept)      | 70.362952 | 1.222667   | 57.549  | < 2e-16  |
| Current          | 0.015724  | 0.003680   | 4.272   | 2.23e-05 |
| Open             | 3.690420  | 2.560442   | 1.441   | 0.1500   |
| Occluded         | 11.114391 | 2.135462   | 5.205   | 2.64e-07 |
| Current*Open     | -0.009227 | 0.007729   | -1.194  | 0.2330   |
| Current*Occluded | -0.012735 | 0.006397   | -1.991  | 0.0469   |

374 AP width (measured as full width at half maximum) is sensitive to changes in  $K_v$  channel compo-  
 375 sition at the AIS, and influences downstream synaptic efficiency (**Kole et al., 2007; Debanne, 2004**).  
 376 The main model for AP width was significantly different from the current only model (**Figure 6G**,  $F =$   
 377  $11.6$ ,  $p = 4.4e-9$ ). Current was significant in the main model (GLM,  $t = -3.17$ ,  $p = 0.00159$ ), and APs  
 378 from Occluded MCs were significantly wider than Control (GLM,  $t = 2.61$ ,  $p = 0.00933$ ). There were  
 379 no significant interactions between group and current (see Table 5 for the model summary, and  
 380 supplemental data set 4 for pairwise comparisons;  $n$  cells = 23 Control, 13 Occluded, and 7 Open).

381

**Table 5.** AP width GLM summary.

| Coefficient      | Estimate   | Std. Error | t-value | p-value |
|------------------|------------|------------|---------|---------|
| (Intercept)      | 1.042e-03  | 1.785e-05  | 58.399  | < 2e-16 |
| Current          | -1.704e-07 | 5.372e-08  | -3.171  | 0.00159 |
| Open             | 3.636e-05  | 3.737e-05  | 0.973   | 0.33099 |
| Occluded         | 8.129e-05  | 3.117e-05  | 2.608   | 0.00933 |
| Current*Open     | 1.557e-08  | 1.128e-07  | 0.138   | 0.89027 |
| Current*Occluded | -9.298e-09 | 9.338e-08  | -0.100  | 0.92071 |

382 AP threshold marks the point where an AP becomes an all-or-none response. We defined AP  
 383 threshold as the voltage when the derivative of the rising phase of the AP reached 25V/s. AP thresh-  
 384 old is typically inversely related to AIS length, with longer AISs often displaying lower thresholds  
 385 (**Kuba et al., 2010; Jamann et al., 2021**). AP threshold is also affected by channel composition (**Katz**  
 386 **et al., 2018**). The main model for AP threshold was significantly different from the current only  
 387 model (**Figure 6H**,  $F = 6.98$ ,  $p = 1.67e-5$ ). Current had a significant effect on threshold in the main

388 model (GLM,  $t = 2.72$ ,  $p = 0.0067$ ). Surprisingly, APs from Open MCs were only marginally lower  
389 than Control (GLM,  $t = -1.92$ ,  $p = 0.0557$ ). There were no significant interactions between group  
390 and current (see Table 6 for the model summary, and supplemental data set 4 for pairwise com-  
391 parisons;  $n$  cells = 23 Control, 13 Occluded, and 7 Open).

392

**Table 6.** AP threshold GLM summary.

| Coefficient      | Estimate   | Std. Error | t value | P value |
|------------------|------------|------------|---------|---------|
| (Intercept)      | -4.981e+01 | 1.082e+00  | -46.032 | < 2e-16 |
| Current          | 8.864e-03  | 3.257e-03  | 2.721   | 0.00668 |
| Open             | -4.344     | 2.266      | -1.917  | 0.05571 |
| Occluded         | -1.672     | 1.890      | -0.885  | 0.37664 |
| Current*Open     | 8.463e-04  | 6.840e-03  | 0.124   | 0.90157 |
| Current*Occluded | 6.891e-03  | 5.661e-03  | 1.217   | 0.22399 |

### 393 Discussion

394 In the OB, trains of APs at the gamma frequency (oscillations) are generated in response to odors  
395 (*Li and Cleland, 2017; Eeckman and Freeman, 1990; Kashiwadani et al., 1999; Bathellier et al.,*  
396 *2006*). These oscillations must reliably travel large distances for further processing in regions such  
397 as the piriform cortex, where precise, synchronized arrival determines whether a cell fires (*Na-*  
398 *gayama et al., 2010; Franks and Isaacson, 2006; Luna and Schoppa, 2008; Bolding and Franks,*  
399 *2018*). Despite the importance of reliable AP transmission over large distances, little is known  
400 about the myelinated axons that generate and propagate APs in the OB, and whether they adapt  
401 in response to changes in sensory input. Here, we characterized the myelinated axons of MCs in  
402 the OB and LOT, and tested whether they adapt to altered sensory input using UNO. We found  
403 that 30 days of adult UNO led to an increase in AIS length of 8% (~2 $\mu$ m) in MCs from Open bulbs  
404 relative to both Occluded bulbs and Control (*Figure 4*). A change of similar magnitude is predicted  
405 by computational modeling to result in significant physiological changes in nonlinear AP character-  
406 istics (*Baalman et al., 2013*). Indeed, we found Naris Occlusion had a significant effect on spiking  
407 patterns, reducing spiking frequency and spike variability (*Figure 6B, D; Tables 1 and 3*).

408

409 In addition to overall spiking patterns, whole cell patch clamp also revealed significant differ-  
410 ences in AP width in AISs from the Occluded side, despite the Occluded cells AIS length being similar  
411 to Controls (*Figure 3 and Figure 6*). Why would AP width increase in Occluded MCs? One possibility  
412 is an adaptation in  $K_v$  channel composition or number.  $K_v$  channels present at the AIS are known  
413 to regulate AP width (*Kole et al., 2007; Debanne, 2004*), and have significant effects on MC firing  
414 pattern diversity (*Padmanabhan and Urban, 2014, 2010*). More  $K_v$  channels could lead to wider  
415 action potentials, which increase the probability of depolarization of downstream cells (*Kole et al.,*  
416 *2007*). This may translate to a counterintuitive *increase* in odor sensitivity on the Occluded side due  
417 to a higher probability of depolarizing a downstream cell in the piriform cortex. This hypothesis is  
418 supported by a previous study showing that Naris Occlusion mice outperformed Control mice in  
419 a habituation-dishabituation olfactory discrimination task (*Angely and Coppola, 2010*). Our results  
420 could represent a novel mechanism to explain that finding. Future work will determine whether  
421 AP shape changes measured in Occluded bulbs translate to physiological adaptations in synapses  
422 at the piriform cortex.

423

424 Another surprising finding was the different distributions of AIS lengths. AIS length distributions  
425 were significantly different between Control animals and Naris Occlusion animals. This increased  
426 diversity was counter-intuitively reflected in an overall lower inter-spike interval CV in the Open



group compared to Control (**Figure 6D**, Table 3). What explains this increased length variance and decreased spiking variance? MCs are biophysically diverse cells, with cell-level firing differences largely attributed to local circuits and OB oscillations, as well as ion channel diversity, particularly in  $K_v$  channels (**Padmanabhan and Urban, 2010, 2014; Heyward et al., 2001; Angelo and Margrie, 2011**). Spiking diversity is thought to increase the information carrying capacity of neurons by de-correlating the firing patterns of groups of neurons (**Padmanabhan and Urban, 2010**). One hypothesis is that the increased range of AIS lengths in Naris Occlusion animals reflects an attempt to encode more information with half the resources. The less variable spiking patterns we measured *in vitro* are likely different than MC spiking patterns *in vivo*. *In vivo*, respiratory rhythm, local circuits/oscillations, and intrinsic membrane oscillations lead to different MC spiking patterns than *in vitro* (**Cang and Isaacson, 2003; Li et al., 2017; Cury and Uchida, 2010; Angelo and Margrie, 2011**). Further experiments will determine how neuronal spike rates change over the course of UNO *in vivo*.

AISs in the Open bulbs are significantly longer than AISs in Control or Occluded bulbs (**Figure 4D**). Longer AISs are typically associated with lower firing thresholds (**Kuba et al., 2010; Jamann et al., 2021**). We found that threshold was only marginally lower across current steps in Open bulb MCs (**Figure 6**,  $p = 0.0557$ , see Table 6). While not significant at  $\alpha = 0.05$ , increased AIS length and marginally decreased firing threshold on the Open side (the side still receiving input) was somewhat surprising. Previous studies report that neurons undergoing deprivation had longer AISs and lower firing thresholds compared to Controls (**Kuba et al., 2010; Jamann et al., 2021**). Similarly, neurons chronically stimulated or in an enriched environment respond by decreasing AIS length or translocating AISs away from the soma, with the effect of decreasing excitability (**Evans et al., 2015; Grubb and Burrone, 2010; Evans et al., 2013; Jamann et al., 2021**). These changes have typically been interpreted in light of a homeostatic response by neurons to regulate excitability (**Wefelmeyer et al., 2016; Yamada and Kuba, 2016**). The opposite effects in our study may be more analogous to a synaptic Hebbian-like response (**Abbott and Nelson, 2000**) to increased input, where neurons become more excitable because they must now work double duty to encode the same amount of information. Previous work in inhibitory dopaminergic neurons in the OB has also described this "inverted" plasticity of the AIS in response to chronic stimulation, noting a cell-type specific response (**Chand et al., 2015**).

Nodes of Ranvier allow for fast saltatory conduction along myelinated axons by regenerating propagating APs at successive gaps in the myelin sheath (**Susuki et al., 2013; Castelfranco and Hartline, 2016**). Recent work has implicated nodes of Ranvier as potential sites for plasticity (**Ford et al., 2015; Arancibia-Carcamo et al., 2017; Dutta et al., 2018; Cullen et al., 2021**). We measured nodes of Ranvier in the LOT following 30 days of UNO. In contrast to the AIS, we found no significant differences in mean node of Ranvier length within Control or within Naris Occlusion animals (**Figure 4**). Surprisingly, we found that node lengths were significantly different when comparing Naris Occlusion animals (both Open and Occluded sides) to Controls (both Left and Right sides). While it is unclear why Naris Occlusion animals exhibit different node lengths compared to Controls, bilateral adaptations following UNO are not unprecedented. In particular, a study investigating *in vivo* synaptic responses of olfactory receptor neurons following UNO found that odor-induced synaptic release was equally reduced in the Open and Occluded sides compared to Controls (**Kass et al., 2013**). Similarly, gene expression in the olfactory mucosa changes on both the Open and Occluded sides compared to Controls (**Coppola and Waggner, 2012**). Bilateral changes following UNO highlight the importance of using comparisons with separate Control animals in UNO studies in addition to within animal (e.g. Left vs. Right bulb) comparisons (**Coppola, 2012**).

Despite finding no changes in the myelin sheath (measured by  $g$ -ratio) or oligodendrocyte lineage cells (**Figure 5**), we found that nodes in Naris Occlusion animals were significantly shorter than

478 nodes from Control animals (**Figure 4**). In the central nervous system, nodes of Ranvier form via a  
479 complex interaction between the myelin sheath (made by oligodendrocytes) and neuronal axons  
480 (**Susuki et al., 2013**), so the lack of change in oligodendrocyte lineage cells and myelin was surpris-  
481 ing. Previous work in the visual system reported monocular deprivation caused proliferation and  
482 maturation of oligodendrocytes, as well as a higher number of short myelin sheaths on the de-  
483 prived side (**Etxeberria et al., 2016**). Motor learning, somatosensory stimulation, and optogenetic  
484 stimulation of neuronal activity in motor cortex have also been reported to increase oligodendro-  
485 cyte lineage cell proliferation, differentiation, and cause myelin sheath remodeling (**Gibson et al.,**  
486 **2014; McKenzie et al., 2014; Xiao et al., 2016; Hughes et al., 2018; Hill et al., 2018**). Many cases  
487 of reported myelin plasticity have involved *in vivo* studies limited to the upper two layers of cor-  
488 tex, a region known to be more sparsely myelinated than large axonal tracts like the LOT (**Tomassy**  
489 **et al., 2014**). In studies where changes in myelination and oligodendrocytes occurred in adulthood,  
490 they were most dramatic on axons which were intermittently myelinated (**Hill et al., 2018; Hughes**  
491 **et al., 2018**), or in animals undergoing active learning (**McKenzie et al., 2014; Xiao et al., 2016**). It is  
492 possible that more highly myelinated regions like LOT may be more stable, and changes in oligo-  
493 dendrocyte lineage cell proliferation and differentiation may require active learning rather than  
494 just reduced input.

495  
496 How could shorter nodes of Ranvier affect olfaction? Modeling studies indicate that shorter  
497 nodes are associated with slower conduction velocity (**Arancibia-Cárcamo et al., 2017**), and a re-  
498 cent study found that competency at a spatial learning task was associated with longer nodes of  
499 Ranvier in the hippocampus and faster conduction speed compared to controls with shorter nodes  
500 (**Cullen et al., 2021**). Based on these results, one would assume that conduction velocity is slower  
501 in animals that underwent Naris Occlusion compared to Controls. It is not immediately clear what  
502 effect potentially slower conduction velocity would have on olfaction. While speed is not thought  
503 of as essential to olfactory processing, coordinated signals and the reliable transmission of oscil-  
504 lations are associated with olfactory processing and learning (**Franks and Isaacson, 2006; Laurent**  
505 **et al., 1996; Kay et al., 2009; Losacco et al., 2020**). Since the node of Ranvier adaptations appear  
506 global (differing between Control and Naris Occlusion but not between LOT sides), one possibility  
507 is that slowing of AP transmission between the OB and downstream olfactory processing regions  
508 serves to better correlate disparate olfactory signals, allowing a higher probability of depolarizing  
509 downstream cells. However, it is hard to predict how adaptations in myelinated axons will affect  
510 the system-level information transfer in oscillations. Computational modeling studies emphasize  
511 the importance of myelin and conduction speed tuning for oscillation synchrony (**Pajevic et al.,**  
512 **2014**), and our lab has previously shown that mild myelin disruption in the *Plp1*-null mouse leads  
513 to increased oscillatory power in the theta and beta frequencies (**Gould et al., 2018**). Future work  
514 will elucidate the effects of smaller nodes in Naris Occlusion animals on conduction velocity and  
515 downstream signal integration. Our work provides evidence for a novel form of cellular plasticity in  
516 the olfactory system where myelinated axons adapt to changing experience input in adult animals.  
517 It is unclear what the systems level consequences of these novel adaptations are, but they are likely  
518 to have important consequences for downstream olfactory system information processing.

519

## 520 **Methods**

### 521 **Source code and imaging data**

522 Source code used for statistics, figure generation, and analysis can be found in the following repos-  
523 itories:

524

- 525 • <https://github.com/nkicg6/excitable-axonal-domains-figures>

526

527 • <https://github.com/nkicg6/excitable-axonal-domains-physiology>

528

529 • <https://github.com/Macklin-Lab/imagej-microscopy-scripts>

530

531 Source imaging data can be found in the following OSF project:

532

533 • <https://osf.io/ez3qt/>

534

### 535 **Statistics**

536 All statistics were performed using the R programming language (*R Core Team, 2019*), and several  
537 packages from the tidyverse family (*Wickham et al., 2019a*). Plots were made using the R package  
538 ggplot2 (*Wickham, 2016*), using Cairo (*Urbanek and Horner, 2020*) for PDF export, or the Python  
539 package matplotlib (*Hunter, 2007*). The R packages dplyr (*Wickham et al., 2019b*), readr (*Wickham  
540 et al., 2018*), tidyr (*Wickham and Henry, 2019*), and cowplot (*Wilke, 2019*) were used for data pro-  
541 cessing and analysis. Results are given as mean  $\pm$  SD, unless otherwise noted in the text. Values  
542 were compared with the Welch two sample *t*-test using R. In the case of multiple comparisons, *p*-  
543 values were corrected using FDR (*Benjamini and Hochberg, 1995*). Statistical significance was set  
544 at  $\alpha = 0.05$  ( $p \leq 0.05$ ).

545

546 The results of statistical tests are presented with the test statistic, degrees of freedom, and *p*  
547 value, if applicable. For example, a *t*-test is presented as: *t*-test, *t*(degrees of freedom) = *t*-statistic,  
548 *p* = *p*-value. Test statistics and *p*-values are rounded to 3 significant figures in the text.

549

### 550 **Animal care**

551 Adult P60-90 wild-type male and female mice (strain C57BL/6J, Jackson Lab #000664) were used  
552 for all experiments. Mice were bred and housed in the University of Colorado Anschutz Medical  
553 campus vivarium.

554

555 Animals were always housed in single-sex cages of 2-5 individuals with a 14/10 hour light/dark  
556 cycle. Mouse chow and water were available ad libitum. Experimental protocols and animal care  
557 were performed in accordance with the Institutional Animal Care and Use Committee at the Uni-  
558 versity of Colorado Anschutz Medical Campus.

559

### 560 **Unilateral naris occlusion**

561 Adult (~P60) wild-type mice (males and females) were anesthetized with an intraperitoneal injec-  
562 tion of 100mg/kg ketamine, 10mg/kg of xylazine. When unresponsive to a toe pinch, animals were  
563 given a local application of 2% lidocaine to the external right naris, and the right naris was briefly  
564 cauterized with a Bovie high temperature cautery (Bovie Medical Corporation, Clearwater, Florida)  
565 and a small amount of super glue was applied to seal the naris. We applied gentamycin ophthalmic  
566 ointment to the eyes during surgery to maintain hydration. After the surgery, animals were given  
567 0.4ml of sterile saline subcutaneously (SC), and SC carprofen (10mg/kg) the day of surgery and the  
568 day after. We monitored the animals as they recovered from anesthesia on a heating pad before  
569 returning them to the vivarium in accordance with the University of Colorado Anschutz Medical  
570 Campus Institutional Animal Care and Use Committee.

571

572 Before the animals were sacrificed for immunohistochemistry, EM, or physiology, we confirmed  
573 naris occlusion by placing 0.1% Triton X-100 on the Occluded naris and ensuring that no bubbles

574 formed (bubbles would indicate incomplete occlusion). A subset of animals were fixed and stained  
575 for TH to confirm effective UNO **Figure 3**.

576

577 Control animals (also called sham) were cage mates of Occluded animals and underwent the  
578 exact same protocol sans cauterization and closing the naris.

579

### 580 **Immunohistochemistry sample preparation**

581 Mice were anesthetized with Fatal-Plus (Vortech Pharmaceuticals, Dearborn, Michigan) and tran-  
582 scardially perfused with 20ml of 0.01M phosphate buffered saline (1X PBS) followed by 20ml of 4%  
583 paraformaldehyde (diluted from a 32% aqueous paraformaldehyde solution with PBS; Electron Mi-  
584 croscopy Sciences [EMS], Hatfield, Pennsylvania) at a flow rate of 10-14ml/min. The brains were  
585 carefully removed and post-fixed in 4% paraformaldehyde for 1-2 hours at 4°C. Following post-fix,  
586 brains were placed in a 30% sucrose-PBS solution for 48 hours for cryoprotection. Brains were  
587 then embedded in molds in optimal cutting temperature (OCT; EMS, Hatfield, Pennsylvania) and  
588 frozen at -80°C until sectioning.

589

590 Slices were serially sectioned in the horizontal plane at 30-40µm thick using a Leica CM1950  
591 (Leica Biosystems, Buffalo Grove, Illinois) and collected as free floating sections in PBS in 24 well  
592 plates. We performed immunohistochemistry within 7-14 days of sectioning.

593

### 594 **Immunohistochemistry**

#### 595 Section sampling

596 We followed the principles of unbiased stereology for cell number and AIS/node of Ranvier length  
597 quantification (*Mouton, 2002; Mouton et al., 2017*). We defined the anatomical quantification area  
598 to be the appropriate regions of OB and LOT (MCL for AISs, GCL and LOT for oligodendrocyte lin-  
599 eage cell quantification, and GL for TH quantification) between approximately -2.04mm to -5.64mm  
600 ventral to bregma suture (*Franklin and Paxinos, 2013; Capra, 2003*). We used a systematic random  
601 sampling scheme to ensure unbiased cell number and AIS/node of Ranvier length quantification  
602 (*Mouton, 2002*). Briefly, we counted the number of sections collected for each animal in the target  
603 anatomical region, and used the Python programming language (Python 3.7.0) "random.choice"  
604 function to choose a random starting point for each set. We then chose every  $n^{\text{th}}$  section, where  
605  $n$  = the number of slices in the anatomical area divided by the target sampling number of slices  
606 (typically 4-5 sections/animal).

607

#### 608 Section labeling

609 We performed immunohistochemical labeling using a free-floating slices protocol modified from  
610 previous studies (*Gould et al., 2018; Ahrendsen et al., 2018*). Slices were processed in batches to  
611 reduce variability and facilitate comparison.

612

613 Slices were washed 3 times for 5 minutes each in 1X PBS, then placed in 10mM sodium citrate  
614 0.05% Tween-20 buffer (pH 6) for 1 minute to equilibrate before microwave-based antigen retrieval  
615 in a PELCO BioWave Pro microwave (550W for 5 minutes; Ted Pella, Redding, California). Following  
616 antigen retrieval, slices were washed 3 times for 5 minutes each in 1X PBS, and permeabilized slices  
617 with 0.1-0.3% Triton X-100 PBS solution for 20 minutes. Slices were then blocked the slices for 1  
618 hour in a solution of 5% normal goat or donkey serum (depending on the antibodies) in 0.3% Triton  
619 X-100 PBS at room temperature. Slices then incubated overnight on a rocker at room temperature  
620 in the blocking solution + primary antibodies (see Table 7 for antibody concentration information,  
621 and Table 9 for vendor information). Incompatible antibodies (e.g., TH and Caspr) were not used



622 on the same slices.

623

**Table 7.** Primary antibody information.

| Antigen             | Host/isotype | Concentration ( $\mu\text{l}$ antibody : $\mu\text{l}$ block) |
|---------------------|--------------|---------------------------------------------------------------|
| AnkG                | Mouse/IgG2a  | 1:500                                                         |
| Plp                 | Rat          | 1:1000                                                        |
| TH                  | Mouse/IgG1   | 1:500                                                         |
| Caspr               | Mouse/IgG1   | 1:500                                                         |
| Na <sub>v</sub> 1.6 | Rabbit       | 1:500                                                         |
| Olig2               | Mouse/IgG2a  | 1:500                                                         |
| PDGFR $\alpha$      | Rat          | 1:500                                                         |
| CC1                 | Mouse/IgG2b  | 1:500                                                         |

624 The following day, slices were washed 4 times for 10 minutes each in 1X PBS, then incubated  
625 for 2 hours in blocking solution and secondary antibodies on a rocker at room temperature (see  
626 Table 8 for secondary antibody concentrations, and Table 9 for vendor information). Following  
627 secondary antibody incubation, slices were washed 4 times for 5 minutes in 1X PBS, the incubated  
628 with the nuclear label Hoechst (diluted 1:5000 in 1X PBS) for 2 minutes on a rocker at room tem-  
629 perature. If slices were labeled with red fluorescent Nissl (NeuroTrace, Thermo Fisher, Waltham,  
630 Massachusetts), we incubated them in a PBS-Nissl solution in the dark for 1 hour, then washed 4  
631 times for 5 minutes in 1X PBS before performing the Hoechst label.

632

633 Slices were then washed 2 times for 5 minutes each in 1X PBS and transferred to 0.01M phos-  
634 phate buffer for mounting. Slices were mounted on uncharged Gold Seal Rite-on glass slides  
635 (Thermo Fisher, Waltham, Massachusetts, CAT # 3050) using Fluoromount-G mounting media (South-  
636 ernBiotech, Birmingham, Alabama) and #1.5 coverslips (Thermo Fisher, Waltham, Massachusetts).  
637 Slides were then stored in the dark at 4°C until imaging.

638

**Table 8.** Secondary antibody information.

| Antigen             | Secondary antibody | Concentration ( $\mu\text{l}$ antibody : $\mu\text{l}$ block) |
|---------------------|--------------------|---------------------------------------------------------------|
| AnkG                | Goat anti IgG2a    | 1:1000                                                        |
| Plp                 | Goat anti Rat      | 1:1000                                                        |
| TH                  | Goat anti IgG1     | 1:1000                                                        |
| Caspr               | Goat anti IgG1     | 1:1000                                                        |
| Na <sub>v</sub> 1.6 | Goat anti Rabbit   | 1:1000                                                        |
| Olig2               | Goat anti IgG2a    | 1:1000                                                        |
| PDGFR $\alpha$      | Goat anti Rat      | 1:1000                                                        |
| CC1                 | Goat anti IgG2b    | 1:1000                                                        |
| Hoechst             | NA                 | 1:5000                                                        |
| NeuroTrace (Nissl)  | NA                 | 1:250                                                         |

639 Physiology section labeling

640 Following whole cell patch clamp experiments, a subset of sections were fixed in 4% paraformalde-  
641 hyde for 2 hours, washed in 1X PBS, and labeled for biocytin, AnkG, and nuclei. After fixation, slices  
642 were washed 3 times for 5 minutes in 1X PBS, then permeabilized in 0.3% Triton X-100 PBS for  
643 20 minutes. Slices were then blocked for 1 hour in a solution of 5% normal goat serum in 0.3%  
644 Triton X-100 PBS. Primary antibodies against AnkG were diluted in blocking solution (see Table

645 7), and slices were left at 4°C on a rocker for approximately 72 hours. Next, slices were washed  
646 4 times for 10 minutes in 1X PBS, before secondary antibodies against AnkG (see Table 8) and  
647 Alexa Fluor 594-conjugated Streptavidin (1  $\mu$ l Streptavidin to 500  $\mu$ l block) were diluted in block-  
648 ing solution and added to the slices. Slices incubated in the dark in secondary antibody at 4°C  
649 for 48 hours. Following secondary antibody incubation, slices were washed 2 times for 5 minutes  
650 in 1X PBS, and incubated in Hoechst diluted in PBS (see Table 8) for 5 minutes. Next, slices were  
651 washed 3 times for 30 minutes in 1X PBS, and mounted on uncharged Gold Seal Rite-on glass slides  
652 (Thermo Fisher, Waltham, Massachusetts, CAT # 3050) using ProLong Gold Antifade mounting media  
653 (Thermo Fisher, Waltham, Massachusetts, CAT # P10144) and #1.5 coverslips (Thermo Fisher  
654 Scientific, Waltham, Massachusetts). Slices were cured in ProLong Gold on a flat surface for 48  
655 hours in the dark before imaging.

656

### 657 **Electron microscopy fixation and sample preparation**

658 Mice were anesthetized with Fatal-Plus (Vortech Pharmaceuticals, Dearborn, Michigan) and tran-  
659 scardially perfused with 10ml of 1X PBS followed by 30ml of EM fixative (2.5% paraformaldehyde,  
660 2.5% glutaraldehyde, 2mM calcium chloride, 0.1M sodium cacodylate buffer). The PBS and EM  
661 fixative were kept on ice at 4°C. After perfusion, the brain was removed and post fixed for ~12  
662 hours at 4°C in the EM fixative. Following post-fix, we stored the brains in 0.1M sodium cacodylate  
663 buffer at 4°C until sectioning. For sectioning, brains were embedded in 4% low-melt agarose for  
664 stability and cut in 1X PBS on a vibratome (Ted Pella, Redding, California) into 300 $\mu$ m thick coronal  
665 sections encompassing the region 2.45-3.05mm anterior to the bregma suture. Further processing  
666 was performed as previously described (*Ahrendsen et al., 2018*). Briefly, using a PELCO Biowave  
667 Pro Tissue Processor (Ted Pella, Redding, California), the tissue was rinsed in 100 mM cacodylate  
668 buffer and then postfixed in a reduced osmium mixture consisting of 1% osmium tetroxide and  
669 1.5% potassium ferrocyanide followed by 1% osmium tetroxide alone. Dehydration was performed  
670 in a graded series of acetone dilutions (50%, 70%, 90%, and 100%) containing 2% uranyl acetate  
671 for en bloc staining. Finally, tissue was infiltrated and embedded in Embed 812 (EMS, Hatfield,  
672 Pennsylvania) and cured for 48 h at 60°C. Tissue was oriented so that sections could be cut in the  
673 coronal plane to visualize the LOT. Ultrathin sections (65nm) were mounted on copper slot grids  
674 and viewed at 80kV on a Tecnai G2 transmission electron microscope (FEI, Hillsboro, Oregon). Elec-  
675 tron micrographs were obtained in consistent regions in the lateral portion of LOT.

676

### 677 **Confocal and Electron Microscopy imaging and quantification**

678 All image analysis (EM and confocal) was performed using the freely available Fiji distribution of  
679 ImageJ (*Schindelin et al., 2012*). EM and confocal images were blinded using a custom Fiji script  
680 called blind-files, provided as part of the Lab-utility-plugins update site (see Source code and imag-  
681 ing data).

682

### 683 **AIS quantification**

684 For AIS quantification, images were taken on a Nikon A1R resonance scanning confocal microscope  
685 (Nikon, Melville, New York) with a Nikon Plan Fluor 40x oil immersion objective (numerical aperture  
686 = 1.3). We acquired 3D confocal stacks 318 $\mu$ m  $\times$  318 $\mu$ m  $\times$  15 $\mu$ m (X  $\times$  Y  $\times$  Z) with a voxel size of 0.31  $\times$   
687 0.31  $\times$  0.225 $\mu$ m<sup>3</sup> (X  $\times$  Y  $\times$  Z). We acquired Hoechst (405nm excitation), AnkG (488nm excitation), Nissl  
688 (561nm excitation), and Plp (640nm excitation) images with a line average of 4. We took images  
689 from lateral and medial MCL of each bulb for analysis. Images were blinded and analyzed in 3D  
690 using the semi-automated tracing tool SNT (*Arshadi et al., 2020*), a Fiji plugin. We traced from the  
691 origin of the AnkG signal at the base of the Nissl+ soma to the termination of the AnkG signal (typ-  
692 ically ending abruptly in a Plp+ myelin sheath, see *Figure 1*). We then used the Fit Paths option in

693 SNT to automatically optimize path fits using 3D intensity around each traced node (*Arshadi et al.,*  
694 *2020*) before exporting length measurements as comma separated value (CSV) spreadsheets for  
695 analysis using R. AIS length analysis was performed for treatment group (Control vs. Naris Occlu-  
696 sion), within group (Left vs. Right for Control, Open vs. Occluded for Naris Occlusion), and between  
697 group (Control vs. Open vs. Occluded). When AISs were grouped by animal, we calculated the mean  
698 AIS length per section and animal.

699

#### 700 Tyrosine hydroxylase quantification

701 Horizontal sections (encompassing both olfactory bulbs) were labeled for TH and nuclei (Hoescht)  
702 as described above. We took tiled images of the whole sections (both bulbs) using a Zeiss Axio  
703 Imager.M2 widefield microscope with a Zeiss 20x Plan-Apochromat (numerical aperture = 0.8) ob-  
704 jective and an HXP 120 metal halide lamp (Carl Zeiss Microscopy, White Plains, New York). The XY  
705 pixel size was 0.65 $\mu\text{m}/\text{pixel}$ . We then cropped the tiled images in Fiji so only one bulb was present  
706 in each image and labeled them appropriately. Images were then blinded for analysis. We used  
707 the polygon tool in Fiji to trace the GL (using the Hoechst labeled nuclei of glomeruli as a guide),  
708 then used a custom Fiji script to extract fluorescence intensity measurements into CSV format for  
709 further analysis using R. We calculated a mean fluorescence intensity (sum pixel intensity / area  
710 traced) per side and animal for the analysis. Intensity is presented in arbitrary units (a.u.) and  
711 either compared directly within animal, or as a relative intensity between Control and Naris Occlu-  
712 sion (Right/Left or Occluded/Open, see *Figure 3*).

713

#### 714 Node of Ranvier quantification

715 Node of Ranvier images were taken on a Nikon A1R resonance scanning confocal microscope  
716 (Nikon, Melville, New York) with a Nikon Plan Fluor 40x oil immersion objective (numerical aper-  
717 ture = 1.3) using a 3X optical zoom. We acquired 3D confocal stacks 106 $\mu\text{m} \times 106\mu\text{m} \times 15\mu\text{m}$  (X  $\times$  Y  
718  $\times$  Z) with a voxel size of 0.106  $\times$  0.106  $\times$  0.25  $\mu\text{m}^3$  (X  $\times$  Y  $\times$  Z). We acquired Caspr (488nm excitation),  
719 and Na<sub>v</sub>1.6 (561 nm excitation) and Plp (640nm excitation) with a line average of 4. We took images  
720 from the LOT of both bulbs on each slice for analysis. Images were blinded before we manually  
721 traced nodes. We traced a random subset of 10-25 nodes per image in 3D using the Fiji segmented  
722 line tool. We only traced nodes where the Na<sub>v</sub>1.6 signal was approximately contained in a single  
723 optical section to control for out of plane errors. After tracing, the ROI files of all traced nodes were  
724 saved, and we used a custom script to extract the Na<sub>v</sub>1.6 fluorescence signal and fit a Gaussian to  
725 the signal using Fiji's curve fitting tools. We extracted the fit parameters and calculated the full  
726 width at half maximum of the fit Gaussian to determine node length. To control for poor fitting,  
727 we excluded all nodes whose Gaussian fit R<sup>2</sup> value were < 0.9. When node lengths were grouped  
728 by animal, we calculated the mean node length per section and animal.

729

#### 730 Oligodendrocyte lineage cell quantification

731 Oligodendrocyte lineage cell images were taken on a Nikon A1R resonance scanning confocal mi-  
732 croscope (Nikon, Melville, New York) with a Nikon Plan Fluor 40x oil immersion objective (numerical  
733 aperture = 1.3). We acquired 3D confocal stacks 318 $\mu\text{m} \times 318\mu\text{m} \times 10\mu\text{m}$  (X  $\times$  Y  $\times$  Z) with a voxel  
734 size of 0.31  $\times$  0.31  $\times$  0.25 $\mu\text{m}^3$  (X  $\times$  Y  $\times$  Z). We acquired Hoechst (405nm excitation), Olig2 (488nm  
735 excitation), PDGFR $\alpha$  (561 nm excitation), and CC1 (640nm excitation) with a line average of 4. We  
736 took images from the GCL and LOT of each bulb for analysis. Images were blinded and analyzed in  
737 3D using the Fiji Cell Counter plugin. Only cells completely contained within the imaging field were  
738 counted. Cell Counter plugin results were saved as CSV for analysis in R.

739

## 740 Whole cell patch clamp cell morphology quantification

741 We took images of a subset of cells filled with biocytin and stained for AnkG on a Nikon A1R resonance scanning confocal microscope (Nikon, Melville, New York) with a Nikon Plan Fluor 40x oil immersion objective (numerical aperture = 1.3). Some images were tiled to create a representative image of the axon and primary dendrite. Voxel size was  $0.62 \times 0.62 \times 1.1 \mu\text{m}^3$  ( $X \times Y \times Z$ ), which was sufficient for a faithful representation of the cells. Images were maximum intensity projected in Z for quantification. We manually checked whether a filled cell had a primary dendrite extending to the glomerulus, and whether it had a visible axon with an AnkG+ AIS.

748

## 749 Electron microscopy quantification

750 EM images were blinded and manually analyzed using the polygon tool in Fiji. We traced a random selection of 10-15 axons per image. The vast majority of axons in the LOT are myelinated by P30 (Collins *et al.*, 2018), so we only traced myelinated axons. We traced the axon and myelin sheaths using the polygon selection tool in Fiji, and calculated the *g*-ratio by dividing the perimeter of the axon by the perimeter of the myelin sheath (Figure 2). A *g*-ratio of 1 indicates an unmyelinated axon, while computational modeling studies propose an optimal *g*-ratio of ~0.77, balancing energy demands of the structure, space, and axonal conduction (Chomiak and Hu, 2009). To calculate axon diameter, we fit the measured perimeter of the polygon to the equivalent circle (perimeter = circumference) and calculated the resulting diameter (Diameter = circumference /  $\pi$ ) (Ahrendsen *et al.*, 2018).

760

## 761 Electrophysiology

### 762 Acute slice preparation

763 For optimal patch clamp recordings on older animals (~P90), we used different modified artificial cerebral spinal fluid (ACSF) solutions for slice preparation and slice incubation (Ting *et al.*, 2014, 2018). Animals were anesthetized with ketamine/xylazine (100mg/kg ketamine, 10mg/kg xylazine) and when unresponsive they were transcardially perfused with 25ml of ice cold N-methyl-D-glucamine (NMDG) based ACSF (NMDG-ACSF, in mM: 92 NMDG, 2.5 KCl, 1.2  $\text{NaH}_2\text{PO}_4$ , 30  $\text{NaHCO}_3$ , 25 glucose, 20 HEPES, 5 Na-ascorbate, 2 thiourea, 3 Na-pyruvate, 10  $\text{MgSO}_4$ , 0.5  $\text{CaCl}_2$ , adjusted to pH 7.4 with 5M HCl, osmolarity 300-310mmol/kg) bubbled continuously with carbogen (95% oxygen, 5% carbon dioxide). The brain was removed, embedded in 2.5% low melt agarose (diluted in NMDG-ACSF), and cut in 300-400 $\mu\text{m}$  horizontal sections using a Compressstome VF-310 (Precision Instruments, Natick, Massachusetts) in carbogen bubbled NMDG-ACSF. Once cut, slices were transferred to incubate at 32°C in carbogen bubbled NMDG-ACSF for 30 minutes (resting period). During the initial resting incubation period, we performed the sodium spike protocol for 3-6 month old mice to optimize gigaohm seal formation (Ting *et al.*, 2018). This involved adding set volumes of 2M sodium chloride at regular intervals to slowly re-equilibrate the slices to sodium ions (described in Ting *et al.* (2018) Table 2 for 3-6mo mice, in  $\mu\text{l}$ : 250 at 5 minutes resting, 500 at 10 minutes resting, 1000 at 15 minutes resting, 2000 at 25 minutes resting, and transfer at 30 minutes).

779

780 Following the sodium spike in, slices were transferred to a room temperature HEPES-based ACSF solution for 1 hour before recording (HEPES-ACSF, in mM: 92 NaCl, 2.5 KCl, 1.2  $\text{NaH}_2\text{PO}_4$ , 30  $\text{NaHCO}_3$ , 25 glucose, 5 Na-ascorbate, 2 thiourea, 3 Na-pyruvate, 2  $\text{MgSO}_4$ , 2  $\text{CaCl}_2$ , adjusted to pH 7.4 with 5M NaOH, osmolarity 300mmol/kg). For all solutions, osmolarity was measured with a VAPRO vapor pressure osmometer (Wescor, Logan, Utah).

785



## 786 Whole cell patch clamp recording

787 Whole cell patch clamp was performed with pipettes filled with a potassium gluconate based in-  
788 ternal solution (in mM: 130 K-gluconate, 10 HEPES, 10 KCl, 0.1 EGTA, 10 Na<sub>2</sub>-phosphocreatine, 4  
789 Mg-ATP, 0.3 Na<sub>2</sub>-GTP, adjusted to pH 7.3 with KOH, osmolarity 280mmol/kg). Some recordings  
790 were done with 2mg/ml of Biocytin, added the day of the experiment, for post-hoc cell visualiza-  
791 tion. Pipettes were pulled from borosilicate glass with filaments, inner diameter 0.86mm, outer  
792 diameter 1.5mm (item BF-150-86-10, Sutter Instruments, Atlanta, Georgia) to a tip resistance of  
793 3-4MOhms with a P-97 Flaming/Brown type micropipette puller (Sutter Instruments, Atlanta, Geor-  
794 gia).

795  
796 We performed all recordings in the presence of the glutamatergic inhibitors 6,7-dinitroquinoxaline-  
797 2,3-dione (DNQX, 10 $\mu$ M), 2-amino-5-phosphonopentanoic acid (APV, 50 $\mu$ M), and the GABAergic in-  
798 hibitor gabazine (5 $\mu$ M) in ACSF (in mM: 5 HEPES, 125 NaCl, 2.5 KCl, 1.25 NaH<sub>2</sub>PO<sub>4</sub>, 24 NaHCO<sub>3</sub>, 12.5  
799 glucose, 2MgSO<sub>4</sub>, 2 CaCl<sub>2</sub>, adjusted to pH 7.4, osmolarity 300-310mmol/kg, bubbled continuously  
800 with carbogen, called recording ACSF).

801  
802 During recording, slices were placed in a custom perfusion chamber continuously perfused  
803 with carbogen bubbled recording ACSF heated to 33-36°C with a SH-27B in line heater and a TC-  
804 324C temperature Controller (Warner Instruments, Hollister, Massachusetts). We performed the  
805 experiments using a Zeiss Axioskop 2 FS Plus microscope (Carl Zeiss Microscopy, White Plains,  
806 New York) equipped with differential interference contrast optics and a 40x (numerical aperture  
807 = 0.8) Zeiss Achroplan water immersion objective (Carl Zeiss Microscopy, White Plains, New York).  
808 We visualized slices using a CoolSNAP HQ2 camera (Teledyne Photometrics, Tucson, Arizona) with  
809 Micro-Manager software version 1.4.22 (*Edelstein et al., 2014*). Patch pipettes were manipulated  
810 using a MP-285 manipulator arm driven by a MPC-200 Controller and ROE-200 micromanipulator  
811 (Sutter Instruments, Atlanta, GA).

812  
813 Data were acquired using Clampex software version 10.5.0.9 with an Axopatch 200A amplifier,  
814 CV-201A headstage, low pass filtered with a Bessel filter at 2kHz and digitized with an Axon Digidata  
815 1550A at 20kHz (Molecular Devices, San Jose, California). We did not correct for a junction potential.  
816 We performed offline filtering of current clamp traces using a 3rd order Savitsky-Golay filter with  
817 a 0.5ms window. Displayed traces were filtered with a 1ms window for appearance (*Figure 6*).

818  
819 MCs were identified based on their large cell bodies and position in the MC layer. A subset of  
820 cells were filled with biocytin, fixed with 4% paraformaldehyde, and visualized to confirm the pres-  
821 ence of an apical dendrite extending to the glomerular layer (*Figure 6A*). Access resistance and  
822 resting potential was checked shortly after achieving whole cell configuration and if it exceeded  
823 40MOhms cells were discarded (*Fadool et al., 2011*). For current clamp experiments, cells were  
824 held at -60mV. We sampled from the first 500ms of the current clamp experiments, before the  
825 current step began, and calculated the mean membrane potential to confirm cells were close to  
826 the target holding potential. We noted no differences between cells from Naris Occlusion and Control  
827 animals (Naris Occlusion -61.3mV  $\pm$  0.95,  $n$  = 20 cells and Control -58.1  $\pm$  2.52,  $n$  = 23 cells,  
828  $t$ -test,  $t(28)$  = 1.11,  $p$  = 0.28; presented as mean  $\pm$  SEM). For current step experiments, a series  
829 of 1000ms current steps were applied to evoke APs (0-500pA, 25pA steps). If multiple recordings  
830 were made from the same cell, we averaged spike counts or AP feature measurements for that cell.  
831

## 832 Electrophysiology analysis

833 Physiology data were analyzed using custom scripts (see *Source code and imaging data*) written in  
834 the Python programming language (version 3.7-3.9). We used the pyABF Python module (version  
835 2.2.8) to open axon binary format files (*Harden, 2020*). Additionally, we used the Python libraries

836 Matplotlib 3.3.2 (*Hunter, 2007*), numpy 1.19.2 (*Harris et al., 2020*), and scipy 1.5.2 (*Virtanen et al.,*  
837 *2020*).

838

### 839 **Reagents and antibodies**

840 See Table 9. The research resource identifier (RRID), chemical abstracts number (CAS), national  
841 drug code (NDC), or catalog number (CAT) for the chemical, drug, or antibody are given. Not appli-  
842 cable (NA) is given if this information is not available or is custom made.

843

**Table 9.** Reagent and antibody information.

| Reagent/antibody                 | Type               | Manufacturer                  | CAT/CAS/RRID #    |
|----------------------------------|--------------------|-------------------------------|-------------------|
| DNQX                             | Chemical/Drug      | Tocris                        | CAT: 0189         |
| APV                              | Chemical/Drug      | Tocris                        | CAT: 0105         |
| Gabazine                         | Chemical/Drug      | Sigma                         | CAT: S106         |
| K-gluconate                      | Chemical/Drug      | Sigma                         | CAT: G4500        |
| Glucose                          | Chemical/Drug      | Sigma                         | CAT: G8270        |
| HEPES                            | Chemical/Drug      | Fisher                        | CAT: BP310        |
| Thiourea                         | Chemical/Drug      | Alfa Aesar                    | CAS: 62-56-6      |
| Na-pyruvate                      | Chemical/Drug      | Sigma                         | CAT: P2256        |
| Na <sub>2</sub> -phosphocreatine | Chemical/Drug      | Sigma                         | CAT: P7936        |
| Na-ascorbate                     | Chemical/Drug      | Sigma                         | CAT: A7631        |
| EGTA                             | Chemical/Drug      | Sigma                         | CAT: E3889        |
| Biocytin                         | Chemical/Drug      | Invitrogen                    | CAT: B1592        |
| Mg-ATP                           | Chemical/Drug      | Sigma                         | CAT: A9187        |
| Na-GTP                           | Chemical/Drug      | Sigma                         | CAT: G8877        |
| CaCl <sub>2</sub>                | Chemical/Drug      | Sigma                         | CAT: C8106        |
| MgSO <sub>4</sub>                | Chemical/Drug      | Macron Fine Chemicals         | CAT: 6066-04      |
| NaHCO <sub>3</sub>               | Chemical/Drug      | Sigma                         | CAT: S5761        |
| NaH <sub>2</sub> PO <sub>4</sub> | Chemical/Drug      | Sigma                         | CAT: S3139        |
| NaCl                             | Chemical/Drug      | RPI                           | CAT: S23020       |
| KCl                              | Chemical/Drug      | Sigma                         | CAT: P9541        |
| NMDG                             | Chemical/Drug      | Acros Organics                | CAT: 126845000    |
| 32% Paraformaldehyde             | Chemical/Drug      | EMS                           | CAT: 15714-S      |
| 25% Glutaraldehyde               | Chemical/Drug      | EMS                           | CAT: 16220        |
| Na-Cacodylate buffer             | Chemical/Drug      | EMS                           | CAT: 11654        |
| Fatal-Plus                       | Chemical/Drug      | Vortech Pharmaceuticals       | NDC: 0298-9373    |
| OCT                              | Chemical/Drug      | EMS                           | CAT: 72592        |
| Tween-20                         | Chemical/Drug      | Thermo Fisher                 | CAT: BP337        |
| Triton X-100                     | Chemical/Drug      | Thermo Fisher                 | CAT: BP151        |
| Hoechst                          | Chemical/Drug      | Promokine                     | CAT: CA707-40013  |
| Fluoromount-G                    | Mounting media     | Southern Biotech              | CAT: 0100-01      |
| Streptavidin                     | Chemical           | Jackson ImmunoResearch        | AB_2337250        |
| NeuroTrace (Nissl)               | Chemical           | Thermo Fisher                 | AB_2620170        |
| AnkG                             | Antibody           | UC Davis/NeuroMab             | RRID: AB_2877524  |
| Plp (AA3)                        | Antibody           | <i>Yamamura et al. (1991)</i> | NA                |
| TH                               | Antibody           | Sigma                         | RRID: AB_477569   |
| Caspr                            | Antibody           | UC Davis/NeuroMab             | RRID: AB_2877274  |
| Na <sub>v</sub> 1.6 (SCN8A)      | Antibody           | Alomone Labs                  | RRID: AB_2040202  |
| Olig2                            | Antibody           | Millipore                     | RRID: AB_10807410 |
| CC1                              | Antibody           | Millipore                     | RRID: AB_2057371  |
| PDGFR $\alpha$ (AP5)             | Antibody           | BD Biosciences                | RRID: AB_2737788  |
| Goat anti Rabbit (594nm)         | Secondary antibody | Thermo Fisher                 | RRID: AB_2534079  |
| Goat anti Rat (647nm)            | Secondary antibody | Thermo Fisher                 | RRID: AB_141778   |
| Goat anti IgG1 (488nm)           | Secondary antibody | Thermo Fisher                 | RRID: AB_2535764  |
| Goat anti IgG1 (647nm)           | Secondary antibody | Thermo Fisher                 | RRID: AB_2535809  |
| Goat anti IgG2a (488nm)          | Secondary antibody | Thermo Fisher                 | RRID: AB_2535771  |
| Goat anti IgG2a (594nm)          | Secondary antibody | Thermo Fisher                 | RRID: AB_2535774  |
| Goat anti IgG2b (647nm)          | Secondary antibody | Thermo Fisher                 | RRID: AB_2535811  |
| Goat anti IgG2b (594nm)          | Secondary antibody | Thermo Fisher                 | RRID: AB_2535781  |

## 844 Acknowledgments

845 We would like to thank Dr. Jennifer Bourne, manager of the University of Colorado Anschutz Med-  
846 ical Campus Electron Microscopy Center for advising on the design of, and performing electron  
847 microscopy experiments for this publication. We would like to thank Nicole Arevalo, MA, for her  
848 expertise and extensive assistance with experiments, animal care, and animal breeding, and Katie  
849 Given, MS, for her invaluable support and technical expertise when performing experiments for  
850 this manuscript. We would also like to thank Dr. John Caldwell and Dr. Nathan Schoppa for ex-  
851 perimental design and data analysis advice, and for reviewing and providing helpful input to the  
852 manuscript. We would also like to thank Dr. Alexandria Hughes for helpful conversations, support,  
853 and review of the manuscript.

854  
855 Research reported in this publication was supported by the National Institute On Deafness  
856 And Other Communication Disorders of the National Institutes of Health under award numbers  
857 F31 DC018459 (NMG) and R01 DC000566 (DR). Support was also provided by the University of Col-  
858 orado Anschutz Neuroscience training program T32 HD041697 and a Colorado Clinical and Trans-  
859 lation Sciences Institute training fellowship TL1 TR001082 (NMG). The content does not necessarily  
860 represent the official views of the National Institutes of Health.  
861

## 862 References

- 863 **Abbott LF**, Nelson SB. Synaptic Plasticity: Taming the Beast. *Nature Neuroscience*. 2000 Nov; 3 Suppl:1178-  
864 1183. doi: 10.1038/81453.
- 865 **Ahrendsen JT**, Harlow DE, Finseth LT, Bourne JN, Hickey SP, Gould EA, Culp CM, Macklin WB. The Protein Ty-  
866 rosine Phosphatase Shp2 Regulates Oligodendrocyte Differentiation and Early Myelination and Contributes  
867 to Timely Remyelination. *The Journal of Neuroscience: The Official Journal of the Society for Neuroscience*.  
868 2018 Jan; 38(4):787-802. doi: 10.1523/JNEUROSCI.2864-16.2017.
- 869 **Angelo K**, Margrie TW. Population Diversity and Function of Hyperpolarization-Activated Current in Olfactory  
870 Bulb Mitral Cells. *Scientific Reports*. 2011; 1:50. doi: 10.1038/srep00050.
- 871 **Angely CJ**, Coppola DM. How Does Long-Term Odor Deprivation Affect the Olfactory Capacity of Adult Mice?  
872 Behavioral and brain functions: *BBF*. 2010 May; 6:26. doi: 10.1186/1744-9081-6-26.
- 873 **Arancibia-Cárcamo IL**, Ford MC, Cossell L, Ishida K, Tohyama K, Attwell D. Node of Ranvier Length as a Potential  
874 Regulator of Myelinated Axon Conduction Speed. *eLife*. 2017 Jan; 6. doi: 10.7554/eLife.23329.
- 875 **Arshadi C**, Eddison M, Günther U, Harrington KIS, Ferreira TA. *SNT: A Unifying Toolbox for Quantification of*  
876 *Neuronal Anatomy*. *Neuroscience*; 2020.
- 877 **Auer F**, Vagionitis S, Czopka T. Evidence for Myelin Sheath Remodeling in the CNS Revealed by In Vivo Imaging.  
878 *Current biology: CB*. 2018 Feb; 28(4):549-559.e3. doi: 10.1016/j.cub.2018.01.017.
- 879 **Baalman KL**, Cotton RJ, Rasband SN, Rasband MN. Blast Wave Exposure Impairs Memory and Decreases Axon  
880 Initial Segment Length. *Journal of Neurotrauma*. 2013 May; 30(9):741-751. doi: 10.1089/neu.2012.2478.
- 881 **Baker H**, Morel K, Stone DM, Maruniak JA. Adult Naris Closure Profoundly Reduces Tyrosine Hydroxylase  
882 Expression in Mouse Olfactory Bulb. *Brain Research*. 1993 Jun; 614(1-2):109-116. doi: 10.1016/0006-  
883 8993(93)91023-L.
- 884 **Balu R**, Larimer P, Strowbridge BW. Phasic Stimuli Evoke Precisely Timed Spikes in Intermittently Discharging  
885 Mitral Cells. *Journal of Neurophysiology*. 2004 Aug; 92(2):743-753. doi: 10.1152/jn.00016.2004.
- 886 **Barres BA**, Raff MC. Proliferation of Oligodendrocyte Precursor Cells Depends on Electrical Activity in Axons.  
887 *Nature*. 1993 Jan; 361(6409):258-260. doi: 10.1038/361258a0.
- 888 **Bathellier B**, Lagier S, Faure P, Lledo PM. Circuit Properties Generating Gamma Oscillations in a Network Model  
889 of the Olfactory Bulb. *Journal of Neurophysiology*. 2006 Apr; 95(4):2678-2691. doi: 10.1152/jn.01141.2005.



- 890 **Benjamini Y**, Hochberg Y. Controlling the False Discovery Rate: A Practical and Powerful Approach to Multiple  
891 Testing. *Journal of the Royal Statistical Society: Series B (Methodological)*. 1995 Jan; 57(1):289–300. doi:  
892 [10.1111/j.2517-6161.1995.tb02031.x](https://doi.org/10.1111/j.2517-6161.1995.tb02031.x).
- 893 **Bhat MA**, Rios JC, Lu Y, Garcia-Fresco GP, Ching W, St Martin M, Li J, Einheber S, Chesler M, Rosenbluth J, Salzer  
894 JL, Bellen HJ. Axon-Glia Interactions and the Domain Organization of Myelinated Axons Requires Neurexin  
895 IV/Caspr/Paranodin. *Neuron*. 2001 May; 30(2):369–383. doi: 10.1016/s0896-6273(01)00294-x.
- 896 **Boiko T**, Rasband MN, Levinson SR, Caldwell JH, Mandel G, Trimmer JS, Matthews G. Compact Myelin Dictates  
897 the Differential Targeting of Two Sodium Channel Isoforms in the Same Axon. *Neuron*. 2001 Apr; 30(1):91–  
898 104. doi: 10.1016/s0896-6273(01)00265-3.
- 899 **Bolding KA**, Franks KM. Recurrent Cortical Circuits Implement Concentration-Invariant Odor Coding. *Science*  
900 (New York, NY). 2018 Sep; 361(6407). doi: [10.1126/science.aat6904](https://doi.org/10.1126/science.aat6904).
- 901 **Caldwell JH**, Schaller KL, Lasher RS, Peles E, Levinson SR. Sodium Channel Na(v)1.6 Is Localized at Nodes of  
902 Ranvier, Dendrites, and Synapses. *Proceedings of the National Academy of Sciences of the United States of*  
903 *America*. 2000 May; 97(10):5616–5620. doi: [10.1073/pnas.090034797](https://doi.org/10.1073/pnas.090034797).
- 904 **Cang J**, Isaacson JS. In Vivo Whole-Cell Recording of Odor-Evoked Synaptic Transmission in the Rat Olfac-  
905 tory Bulb. *The Journal of Neuroscience: The Official Journal of the Society for Neuroscience*. 2003 May;  
906 23(10):4108–4116.
- 907 **Capra T**, The Mouse Brain Library; 2003. [http://www.mbl.org/atlas247/atlas247\\_frame.html](http://www.mbl.org/atlas247/atlas247_frame.html).
- 908 **Castelfranco AM**, Hartline DK. Evolution of Rapid Nerve Conduction. *Brain Research*. 2016 Jun; 1641(Pt A):11–  
909 33. doi: [10.1016/j.brainres.2016.02.015](https://doi.org/10.1016/j.brainres.2016.02.015).
- 910 **Chand AN**, Galliano E, Chesters RA, Grubb MS. A Distinct Subtype of Dopaminergic Interneuron Displays In-  
911 verted Structural Plasticity at the Axon Initial Segment. *The Journal of Neuroscience: The Official Journal of*  
912 *the Society for Neuroscience*. 2015 Jan; 35(4):1573–1590. doi: [10.1523/JNEUROSCI.3515-14.2015](https://doi.org/10.1523/JNEUROSCI.3515-14.2015).
- 913 **Chen WR**, Shepherd GM. Membrane and Synaptic Properties of Mitral Cells in Slices of Rat Olfactory Bulb.  
914 *Brain Research*. 1997 Jan; 745(1-2):189–196. doi: 10.1016/s0006-8993(96)01150-x.
- 915 **Chomiak T**, Hu B. What Is the Optimal Value of the G-Ratio for Myelinated Fibers in the Rat CNS? A Theoretical  
916 Approach. *PloS One*. 2009 Nov; 4(11):e7754. doi: [10.1371/journal.pone.0007754](https://doi.org/10.1371/journal.pone.0007754).
- 917 **Chon U**, LaFever BJ, Nguyen U, Kim Y, Imamura F. Topographically Distinct Projection Patterns of Early-  
918 Generated and Late-Generated Projection Neurons in the Mouse Olfactory Bulb. *eNeuro*. 2020; 7(6). doi:  
919 [10.1523/ENEURO.0369-20.2020](https://doi.org/10.1523/ENEURO.0369-20.2020).
- 920 **Chu MW**, Li WL, Komiyama T. Balancing the Robustness and Efficiency of Odor Representations during Learning.  
921 *Neuron*. 2016 Oct; 92(1):174–186. doi: [10.1016/j.neuron.2016.09.004](https://doi.org/10.1016/j.neuron.2016.09.004).
- 922 **Collins LN**, Hill DL, Brunjes PC. Myelination of the Developing Lateral Olfactory Tract and Anterior Commissure.  
923 *The Journal of Comparative Neurology*. 2018 Aug; 526(11):1843–1858. doi: [10.1002/cne.24452](https://doi.org/10.1002/cne.24452).
- 924 **Coppola DM**. Studies of Olfactory System Neural Plasticity: The Contribution of the Unilateral Naris Occlusion  
925 Technique. *Neural Plasticity*. 2012; 2012:351752. doi: 10.1155/2012/351752.
- 926 **Coppola DM**, Waggener CT. The Effects of Unilateral Naris Occlusion on Gene Expression Profiles in Mouse  
927 Olfactory Mucosa. *Journal of molecular neuroscience: MN*. 2012 Jul; 47(3):604–618. doi: 10.1007/s12031-  
928 011-9690-4.
- 929 **Cullen CL**, Pepper RE, Clutterbuck MT, Pitman KA, Oorschot V, Auderset L, Tang AD, Ramm G, Emery B, Rodger  
930 J, Jolivet RB, Young KM. Periaxonal and Nodal Plasticities Modulate Action Potential Conduction in the Adult  
931 Mouse Brain. *Cell Reports*. 2021 Jan; 34(3):108641. doi: [10.1016/j.celrep.2020.108641](https://doi.org/10.1016/j.celrep.2020.108641).
- 932 **Cury KM**, Uchida N. Robust Odor Coding via Inhalation-Coupled Transient Activity in the Mammalian Olfactory  
933 Bulb. *Neuron*. 2010 Nov; 68(3):570–585. doi: [10.1016/j.neuron.2010.09.040](https://doi.org/10.1016/j.neuron.2010.09.040).
- 934 **Debanne D**. Information Processing in the Axon. *Nature Reviews Neuroscience*. 2004 Apr; 5(4):304–316. doi:  
935 [10.1038/nrn1397](https://doi.org/10.1038/nrn1397).
- 936 **Doucette W**, Gire DH, Whitesell J, Carmean V, Lucero MT, Restrepo D. Associative Cortex Features in the First  
937 Olfactory Brain Relay Station. *Neuron*. 2011 Mar; 69(6):1176–1187. doi: [10.1016/j.neuron.2011.02.024](https://doi.org/10.1016/j.neuron.2011.02.024).

- 938 **Dutta DJ**, Woo DH, Lee PR, Pajevic S, Bukalo O, Huffman WC, Wake H, Bassar PJ, SheikhBahaei S, Lazarevic V,  
939 Smith JC, Fields RD. Regulation of Myelin Structure and Conduction Velocity by Perinodal Astrocytes. *Proceed-*  
940 *ings of the National Academy of Sciences of the United States of America*. 2018 Nov; 115(46):11832–11837.  
941 doi: [10.1073/pnas.1811013115](https://doi.org/10.1073/pnas.1811013115).
- 942 **Edelstein AD**, Tsuchida MA, Amodaj N, Pinkard H, Vale RD, Stuurman N. Advanced Methods of Microscope  
943 Control Using  $\mu$ Manager Software. *Journal of Biological Methods*. 2014; 1(2). doi: [10.14440/jbm.2014.36](https://doi.org/10.14440/jbm.2014.36).
- 944 **Eeckman FH**, Freeman WJ. Correlations between Unit Firing and EEG in the Rat Olfactory System. *Brain Re-*  
945 *search*. 1990 Oct; 528(2):238–244. doi: [10.1016/0006-8993\(90\)91663-2](https://doi.org/10.1016/0006-8993(90)91663-2).
- 946 **Egger V**, Urban NN. Dynamic Connectivity in the Mitral Cell-Granule Cell Microcircuit. *Seminars in Cell & Devel-*  
947 *opmental Biology*. 2006 Aug; 17(4):424–432. doi: [10.1016/j.semcdb.2006.04.006](https://doi.org/10.1016/j.semcdb.2006.04.006).
- 948 **Etxeberria A**, Hokanson KC, Dao DQ, Mayoral SR, Mei F, Redmond SA, Ullian EM, Chan JR. Dynamic Mod-  
949 *ulation of Myelination in Response to Visual Stimuli Alters Optic Nerve Conduction Velocity*. *The Journal*  
950 *of Neuroscience: The Official Journal of the Society for Neuroscience*. 2016 Jun; 36(26):6937–6948. doi:  
951 [10.1523/JNEUROSCI.0908-16.2016](https://doi.org/10.1523/JNEUROSCI.0908-16.2016).
- 952 **Evans MD**, Dumitrescu AS, Kruijssen DLH, Taylor SE, Grubb MS. Rapid Modulation of Axon Initial  
953 *Segment Length Influences Repetitive Spike Firing*. *Cell Reports*. 2015 Nov; 13(6):1233–1245. doi:  
954 [10.1016/j.celrep.2015.09.066](https://doi.org/10.1016/j.celrep.2015.09.066).
- 955 **Evans MD**, Sammons RP, Lebron S, Dumitrescu AS, Watkins TBK, Uebele VN, Renger JJ, Grubb MS. Cal-  
956 *cineurin Signaling Mediates Activity-Dependent Relocation of the Axon Initial Segment*. *The Journal of*  
957 *Neuroscience: The Official Journal of the Society for Neuroscience*. 2013 Apr; 33(16):6950–6963. doi:  
958 [10.1523/JNEUROSCI.0277-13.2013](https://doi.org/10.1523/JNEUROSCI.0277-13.2013).
- 959 **Fadool DA**, Tucker K, Pedarzani P. Mitral Cells of the Olfactory Bulb Perform Metabolic Sensing and Are Dis-  
960 *rupted by Obesity at the Level of the Kv1.3 Ion Channel*. *PloS One*. 2011; 6(9):e24921. doi: [10.1371/jour-](https://doi.org/10.1371/jour-)  
961 [nal.pone.0024921](https://doi.org/10.1371/journal.pone.0024921).
- 962 **Ford MC**, Alexandrova O, Cossell L, Stange-Marten A, Sinclair J, Kopp-Scheinflug C, Pecka M, Attwell D, Grothe  
963 *B. Tuning of Ranvier Node and Internode Properties in Myelinated Axons to Adjust Action Potential Timing*.  
964 *Nature Communications*. 2015 Aug; 6:8073. doi: [10.1038/ncomms9073](https://doi.org/10.1038/ncomms9073).
- 965 **Franklin KBJ**, Paxinos G. Paxinos and Franklin's The Mouse Brain in Stereotaxic Coordinates. Fourth edition  
966 *ed*. Amsterdam: Academic Press, an imprint of Elsevier; 2013.
- 967 **Franks KM**, Isaacson JS. Strong Single-Fiber Sensory Inputs to Olfactory Cortex: Implications for Olfactory  
968 *Coding*. *Neuron*. 2006 Feb; 49(3):357–363. doi: [10.1016/j.neuron.2005.12.026](https://doi.org/10.1016/j.neuron.2005.12.026).
- 969 **Friedrich RW**, Habermann CJ, Laurent G. Multiplexing Using Synchrony in the Zebrafish Olfactory Bulb. *Nature*  
970 *Neuroscience*. 2004 Aug; 7(8):862–871. doi: [10.1038/nn1292](https://doi.org/10.1038/nn1292).
- 971 **Fukunaga I**, Herb JT, Kollo M, Boyden ES, Schaefer AT. Independent Control of Gamma and Theta Activity by  
972 *Distinct Interneuron Networks in the Olfactory Bulb*. *Nature Neuroscience*. 2014 Sep; 17(9):1208–1216. doi:  
973 [10.1038/nn.3760](https://doi.org/10.1038/nn.3760).
- 974 **Fünfschilling U**, Supplie LM, Mahad D, Boretius S, Saab AS, Edgar J, Brinkmann BG, Kassmann CM, Tzve-  
975 *tanova ID, Möbius W, Diaz F, Meijer D, Suter U, Hamprecht B, Sereda MW, Moraes CT, Frahm J, Goebbels*  
976 *S, Nave KA. Glycolytic Oligodendrocytes Maintain Myelin and Long-Term Axonal Integrity*. *Nature*. 2012 Apr;  
977 [485\(7399\):517–521](https://doi.org/10.1038/nature11007). doi: [10.1038/nature11007](https://doi.org/10.1038/nature11007).
- 978 **Gibson EM**, Purger D, Mount CW, Goldstein AK, Lin GL, Wood LS, Inema I, Miller SE, Bieri G, Zuchero JB, Barres  
979 *BA, Woo PJ, Vogel H, Monje M. Neuronal Activity Promotes Oligodendrogenesis and Adaptive Myelination in*  
980 *the Mammalian Brain*. *Science (New York, NY)*. 2014 May; 344(6183):1252304. doi: [10.1126/science.1252304](https://doi.org/10.1126/science.1252304).
- 981 **Gire DH**, Whitesell JD, Doucette W, Restrepo D. Information for Decision-Making and Stimulus Identification Is  
982 *Multiplexed in Sensory Cortex*. *Nature Neuroscience*. 2013 Aug; 16(8):991–993. doi: [10.1038/nn.3432](https://doi.org/10.1038/nn.3432).
- 983 **Gould EA**, Busquet N, Shepherd D, Dietz RM, Herson PS, Simoes de Souza FM, Li A, George NM, Restrepo D,  
984 *Macklin WB. Mild Myelin Disruption Elicits Early Alteration in Behavior and Proliferation in the Subventricular*  
985 *Zone*. *eLife*. 2018 Feb; 7. doi: [10.7554/eLife.34783](https://doi.org/10.7554/eLife.34783).
- 986 **Grubb MS**, Burrone J. Activity-Dependent Relocation of the Axon Initial Segment Fine-Tunes Neuronal Excitabil-  
987 *ity*. *Nature*. 2010 Jun; 465(7301):1070–1074. doi: [10.1038/nature09160](https://doi.org/10.1038/nature09160).

- 988 **Gschwend O**, Abraham NM, Lagier S, Begnaud F, Rodriguez I, Carleton A. Neuronal Pattern Separation in the  
989 Olfactory Bulb Improves Odor Discrimination Learning. *Nature Neuroscience*. 2015 Oct; 18(10):1474–1482.  
990 doi: [10.1038/nn.4089](https://doi.org/10.1038/nn.4089).
- 991 **Hamada MS**, Popovic MA, Kole MHP. Loss of Saltation and Presynaptic Action Potential Failure in Demyelinated  
992 Axons. *Frontiers in Cellular Neuroscience*. 2017; 11:45. doi: [10.3389/fncel.2017.00045](https://doi.org/10.3389/fncel.2017.00045).
- 993 **Harden SW**, pyABF v2.2.8; 2020.
- 994 **Harris CR**, Millman KJ, van der Walt SJ, Gommers R, Virtanen P, Cournapeau D, Wieser E, Taylor J, Berg S, Smith  
995 NJ, Kern R, Picus M, Hoyer S, van Kerkwijk MH, Brett M, Haldane A, Fernández del Río J, Wiebe M, Peterson P,  
996 Gérard-Marchant P, et al. Array Programming with NumPy. *Nature*. 2020; 585:357–362. doi: [10.1038/s41586-020-2649-2](https://doi.org/10.1038/s41586-020-2649-2).
- 998 **Hedstrom KL**, Ogawa Y, Rasband MN. AnkyrinG Is Required for Maintenance of the Axon Initial Segment and  
999 Neuronal Polarity. *Journal of Cell Biology*. 2008 Nov; 183(4):635–640. doi: [10.1083/jcb.200806112](https://doi.org/10.1083/jcb.200806112).
- 1000 **Heyward P**, Ennis M, Keller A, Shipley MT. Membrane Bistability in Olfactory Bulb Mitral Cells. *The Journal of Neuroscience: The Official Journal of the Society for Neuroscience*. 2001 Jul; 21(14):5311–5320. doi: [10.1523/JNEUROSCI.21-14-05311.2001](https://doi.org/10.1523/JNEUROSCI.21-14-05311.2001).
- 1003 **Hill RA**, Li AM, Grutzendler J. Lifelong Cortical Myelin Plasticity and Age-Related Degeneration in the Live Mammalian Brain. *Nature Neuroscience*. 2018 May; 21(5):683–695. doi: [10.1038/s41593-018-0120-6](https://doi.org/10.1038/s41593-018-0120-6).
- 1005 **Hinds JW**, Ruffett TL. Mitral Cell Development in the Mouse Olfactory Bulb: Reorientation of the Perikaryon and  
1006 Maturation of the Axon Initial Segment. *The Journal of Comparative Neurology*. 1973 Oct; 151(3):281–306.  
1007 doi: [10.1002/cne.901510305](https://doi.org/10.1002/cne.901510305).
- 1008 **Hughes EG**, Orthmann-Murphy JL, Langseth AJ, Bergles DE. Myelin Remodeling through Experience-Dependent  
1009 Oligodendrogenesis in the Adult Somatosensory Cortex. *Nature Neuroscience*. 2018 May; 21(5):696–706. doi: [10.1038/s41593-018-0121-5](https://doi.org/10.1038/s41593-018-0121-5).
- 1011 **Hunter JD**. Matplotlib: A 2D Graphics Environment. *Computing in Science & Engineering*. 2007; 9(3):90–95. doi: [10.1109/MCSE.2007.55](https://doi.org/10.1109/MCSE.2007.55).
- 1013 **Imamura F**, Ito A, LaFever BJ. Subpopulations of Projection Neurons in the Olfactory Bulb. *Frontiers in Neural Circuits*. 2020; 14:561822. doi: [10.3389/fncir.2020.561822](https://doi.org/10.3389/fncir.2020.561822).
- 1015 **Jamann N**, Dannehl D, Lehmann N, Wagener R, Thielemann C, Schultz C, Staiger J, Kole MHP, Engelhardt M. Sensory Input Drives Rapid Homeostatic Scaling of the Axon Initial Segment in Mouse Barrel Cortex. *Nature Communications*. 2021 Jan; 12(1):23. doi: [10.1038/s41467-020-20232-x](https://doi.org/10.1038/s41467-020-20232-x).
- 1018 **Kashiwadani H**, Sasaki YF, Uchida N, Mori K. Synchronized Oscillatory Discharges of Mitral/Tufted Cells with  
1019 Different Molecular Receptive Ranges in the Rabbit Olfactory Bulb. *Journal of Neurophysiology*. 1999 Oct; 82(4):1786–1792. doi: [10.1152/jn.1999.82.4.1786](https://doi.org/10.1152/jn.1999.82.4.1786).
- 1021 **Kass MD**, Pottackal J, Turkel DJ, McGann JP. Changes in the Neural Representation of Odorants after Olfactory Deprivation in the Adult Mouse Olfactory Bulb. *Chemical Senses*. 2013 Jan; 38(1):77–89. doi: [10.1093/chemse/bjs081](https://doi.org/10.1093/chemse/bjs081).
- 1024 **Katz E**, Stoler O, Scheller A, Khrapunsky Y, Goebbels S, Kirchhoff F, Gutnick MJ, Wolf F, Fleidervish IA. Role of Sodium Channel Subtype in Action Potential Generation by Neocortical Pyramidal Neurons. *Proceedings of the National Academy of Sciences of the United States of America*. 2018 Jul; 115(30):E7184–E7192. doi: [10.1073/pnas.1720493115](https://doi.org/10.1073/pnas.1720493115).
- 1028 **Kay LM**, Beshel J, Brea J, Martin C, Rojas-Líbano D, Kopell N. Olfactory Oscillations: The What, How and What For. *Trends in Neurosciences*. 2009 Apr; 32(4):207–214. doi: [10.1016/j.tins.2008.11.008](https://doi.org/10.1016/j.tins.2008.11.008).
- 1030 **Kim JH**, Renden R, von Gersdorff H. Dysmyelination of Auditory Afferent Axons Increases the Jitter of Action Potential Timing during High-Frequency Firing. *The Journal of Neuroscience: The Official Journal of the Society for Neuroscience*. 2013 May; 33(22):9402–9407. doi: [10.1523/JNEUROSCI.3389-12.2013](https://doi.org/10.1523/JNEUROSCI.3389-12.2013).
- 1033 **Kole MHP**, Ilshchner SU, Kampa BM, Williams SR, Ruben PC, Stuart GJ. Action Potential Generation Requires a High Sodium Channel Density in the Axon Initial Segment. *Nature Neuroscience*. 2008 Feb; 11(2):178–186. doi: [10.1038/nn2040](https://doi.org/10.1038/nn2040).

- 1036 **Kole MHP**, Stuart GJ. Signal Processing in the Axon Initial Segment. *Neuron*. 2012 Jan; 73(2):235–247. doi:  
1037 [10.1016/j.neuron.2012.01.007](https://doi.org/10.1016/j.neuron.2012.01.007).
- 1038 **Kole MHP**. First Node of Ranvier Facilitates High-Frequency Burst Encoding. *Neuron*. 2011 Aug; 71(4):671–682.  
1039 doi: [10.1016/j.neuron.2011.06.024](https://doi.org/10.1016/j.neuron.2011.06.024).
- 1040 **Kole MHP**, Letzkus JJ, Stuart GJ. Axon Initial Segment Kv1 Channels Control Axonal Action Potential Waveform  
1041 and Synaptic Efficacy. *Neuron*. 2007 Aug; 55(4):633–647. doi: [10.1016/j.neuron.2007.07.031](https://doi.org/10.1016/j.neuron.2007.07.031).
- 1042 **Kuba H**, Oichi Y, Ohmori H. Presynaptic Activity Regulates Na(+) Channel Distribution at the Axon Initial Seg-  
1043 ment. *Nature*. 2010 Jun; 465(7301):1075–1078. doi: [10.1038/nature09087](https://doi.org/10.1038/nature09087).
- 1044 **Laurent G**, Wehr M, Davidowitz H. Temporal Representations of Odors in an Olfactory Network. *The Journal*  
1045 *of Neuroscience: The Official Journal of the Society for Neuroscience*. 1996 Jun; 16(12):3837–3847.
- 1046 **Lazarini F**, Mouthon MA, Gheusi G, de Chaumont F, Olivo-Marin JC, Lamarque S, Abrous DN, Boussin FD, Lledo  
1047 PM. Cellular and Behavioral Effects of Cranial Irradiation of the Subventricular Zone in Adult Mice. *PLoS One*.  
1048 2009 Sep; 4(9):e7017. doi: [10.1371/journal.pone.0007017](https://doi.org/10.1371/journal.pone.0007017).
- 1049 **Lepousez G**, Lledo PM. Odor Discrimination Requires Proper Olfactory Fast Oscillations in Awake Mice. *Neuron*.  
1050 2013 Nov; 80(4):1010–1024. doi: [10.1016/j.neuron.2013.07.025](https://doi.org/10.1016/j.neuron.2013.07.025).
- 1051 **Li A**, Guthman EM, Doucette WT, Restrepo D. Behavioral Status Influences the Dependence of Odorant-Induced  
1052 Change in Firing on Prestimulus Firing Rate. *The Journal of Neuroscience: The Official Journal of the Society*  
1053 *for Neuroscience*. 2017 Feb; 37(7):1835–1852. doi: [10.1523/JNEUROSCI.3132-16.2017](https://doi.org/10.1523/JNEUROSCI.3132-16.2017).
- 1054 **Li G**, Cleland TA. A Coupled-Oscillator Model of Olfactory Bulb Gamma Oscillations. *PLoS computational biology*.  
1055 2017 Nov; 13(11):e1005760. doi: [10.1371/journal.pcbi.1005760](https://doi.org/10.1371/journal.pcbi.1005760).
- 1056 **Lorincz A**, Nusser Z. Cell-Type-Dependent Molecular Composition of the Axon Initial Segment. *The Journal*  
1057 *of Neuroscience: The Official Journal of the Society for Neuroscience*. 2008 Dec; 28(53):14329–14340. doi:  
1058 [10.1523/JNEUROSCI.4833-08.2008](https://doi.org/10.1523/JNEUROSCI.4833-08.2008).
- 1059 **Losacco J**, Ramirez-Gordillo D, Gilmer J, Restrepo D. Learning Improves Decoding of Odor Identity with Phase-  
1060 Referenced Oscillations in the Olfactory Bulb. *eLife*. 2020 Jan; 9. doi: [10.7554/eLife.52583](https://doi.org/10.7554/eLife.52583).
- 1061 **Luna VM**, Schoppa NE. GABAergic Circuits Control Input-Spike Coupling in the Piriform Cortex. *The Journal*  
1062 *of Neuroscience: The Official Journal of the Society for Neuroscience*. 2008 Aug; 28(35):8851–8859. doi:  
1063 [10.1523/JNEUROSCI.2385-08.2008](https://doi.org/10.1523/JNEUROSCI.2385-08.2008).
- 1064 **McKenzie IA**, Ohayon D, Li H, Paes de Faria J, Emery B, Tohyama K, Richardson WD. Motor Skill Learning  
1065 Requires Active Central Myelination. *Science*. 2014 Oct; 346(6207):318–322. doi: [10.1126/science.1254960](https://doi.org/10.1126/science.1254960).
- 1066 **Meyer N**, Richter N, Fan Z, Siemonsmeier G, Pivneva T, Jordan P, Steinhäuser C, Semtner M, Nolte C, Kettenmann  
1067 H. Oligodendrocytes in the Mouse Corpus Callosum Maintain Axonal Function by Delivery of Glucose. *Cell*  
1068 *Reports*. 2018 Feb; 22(9):2383–2394. doi: [10.1016/j.celrep.2018.02.022](https://doi.org/10.1016/j.celrep.2018.02.022).
- 1069 **Mouton PR**. Principles and Practices of Unbiased Stereology: An Introduction for Bioscientists. Baltimore:  
1070 Johns Hopkins University Press; 2002.
- 1071 **Mouton PR**, Phoulady HA, Goldgof D, Hall LO, Gordon M, Morgan D. Unbiased Estimation of Cell Number  
1072 Using the Automatic Optical Fractionator. *Journal of Chemical Neuroanatomy*. 2017 Mar; 80:A1–A8. doi:  
1073 [10.1016/j.jchemneu.2016.12.002](https://doi.org/10.1016/j.jchemneu.2016.12.002).
- 1074 **Nagayama S**, Enerva A, Fletcher ML, Masurkar AV, Igarashi KM, Mori K, Chen WR. Differential Axonal Projection  
1075 of Mitral and Tufted Cells in the Mouse Main Olfactory System. *Frontiers in Neural Circuits*. 2010; 4. doi:  
1076 [10.3389/fncir.2010.00120](https://doi.org/10.3389/fncir.2010.00120).
- 1077 **Padmanabhan K**, Urban NN. Intrinsic Biophysical Diversity Decorrelates Neuronal Firing While Increasing  
1078 Information Content. *Nature Neuroscience*. 2010 Oct; 13(10):1276–1282. doi: [10.1038/nn.2630](https://doi.org/10.1038/nn.2630).
- 1079 **Padmanabhan K**, Urban NN. Disrupting Information Coding via Block of 4-AP-Sensitive Potassium Channels.  
1080 *Journal of Neurophysiology*. 2014 Sep; 112(5):1054–1066. doi: [10.1152/jn.00823.2013](https://doi.org/10.1152/jn.00823.2013).
- 1081 **Pajevic S**, Basser PJ, Fields RD. Role of Myelin Plasticity in Oscillations and Synchrony of Neuronal Activity.  
1082 *Neuroscience*. 2014 Sep; 276:135–147. doi: [10.1016/j.neuroscience.2013.11.007](https://doi.org/10.1016/j.neuroscience.2013.11.007).



- 1083 **Palmer LM**, Stuart GJ. Site of Action Potential Initiation in Layer 5 Pyramidal Neurons. *The Journal of*  
1084 *Neuroscience: The Official Journal of the Society for Neuroscience*. 2006 Feb; 26(6):1854–1863. doi:  
1085 [10.1523/JNEUROSCI.4812-05.2006](https://doi.org/10.1523/JNEUROSCI.4812-05.2006).
- 1086 **Philpot BD**, Klintsova AY, Brunjes PC. Oligodendrocyte/Myelin-Immunoreactivity in the Developing Olfactory  
1087 System. *Neuroscience*. 1995 Aug; 67(4):1009–1019. doi: 10.1016/0306-4522(95)00095-z.
- 1088 **Price JL**, Powell TP. The Mitral and Short Axon Cells of the Olfactory Bulb. *Journal of Cell Science*. 1970 Nov;  
1089 7(3):631–651.
- 1090 **R Core Team**. R: A Language and Environment for Statistical Computing. R Foundation for Statistical Computing,  
1091 Vienna, Austria; 2019.
- 1092 **Rasband MN**, Kagawa T, Park EW, Ikenaka K, Trimmer JS. Dysregulation of Axonal Sodium Channel Isoforms  
1093 after Adult-Onset Chronic Demyelination. *Journal of Neuroscience Research*. 2003 Aug; 73(4):465–470. doi:  
1094 [10.1002/jnr.10675](https://doi.org/10.1002/jnr.10675).
- 1095 **Rios JC**, Rubin M, Martin MS, Downey RT, Einheber S, Rosenbluth J, Levinson SR, Bhat M, Salzer JL. Paran-  
1096 odal Interactions Regulate Expression of Sodium Channel Subtypes and Provide a Diffusion Barrier for the  
1097 Node of Ranvier. *The Journal of Neuroscience*. 2003 Aug; 23(18):7001–7011. doi: [10.1523/JNEUROSCI.23-18-  
1098 07001.2003](https://doi.org/10.1523/JNEUROSCI.23-18-07001.2003).
- 1099 **Rushton WaH**. A Theory of the Effects of Fibre Size in Medullated Nerve. *The Journal of Physiology*. 1951 Sep;  
1100 115(1):101–122. doi: [10.1113/jphysiol.1951.sp004655](https://doi.org/10.1113/jphysiol.1951.sp004655).
- 1101 **Sawada M**, Kaneko N, Inada H, Wake H, Kato Y, Yanagawa Y, Kobayashi K, Nemoto T, Nabekura J, Sawamoto  
1102 K. Sensory Input Regulates Spatial and Subtype-Specific Patterns of Neuronal Turnover in the Adult Olfac-  
1103 tory Bulb. *The Journal of Neuroscience: The Official Journal of the Society for Neuroscience*. 2011 Aug;  
1104 31(32):11587–11596. doi: [10.1523/JNEUROSCI.0614-11.2011](https://doi.org/10.1523/JNEUROSCI.0614-11.2011).
- 1105 **Schindelin J**, Arganda-Carreras I, Frise E, Kaynig V, Longair M, Pietzsch T, Preibisch S, Rueden C, Saalfeld S,  
1106 Schmid B, TinevezJY, White DJ, Hartenstein V, Eliceiri K, Tomancak P, Cardona A. Fiji: An Open-Source Platform  
1107 for Biological-Image Analysis. *Nature Methods*. 2012 Jun; 9(7):676–682. doi: [10.1038/nmeth.2019](https://doi.org/10.1038/nmeth.2019).
- 1108 **Schoppa NE**, Westbrook GL. Glomerulus-Specific Synchronization of Mitral Cells in the Olfactory Bulb. *Neuron*.  
1109 2001 Aug; 31(4):639–651. doi: 10.1016/s0896-6273(01)00389-0.
- 1110 **Schwob JE**, Price JL. The Development of Axonal Connections in the Central Olfactory System of Rats. *The*  
1111 *Journal of Comparative Neurology*. 1984 Feb; 223(2):177–202. doi: [10.1002/cne.902230204](https://doi.org/10.1002/cne.902230204).
- 1112 **Susuki K**, Chang KJ, Zollinger DR, Liu Y, Ogawa Y, Eshed-Eisenbach Y, Dours-Zimmermann MT, Oses-Prieto  
1113 JA, Burlingame AL, Seidenbecher CI, Zimmermann DR, Oohashi T, Peles E, Rasband MN. Three Mech-  
1114 anisms Assemble Central Nervous System Nodes of Ranvier. *Neuron*. 2013 May; 78(3):469–482. doi:  
1115 [10.1016/j.neuron.2013.03.005](https://doi.org/10.1016/j.neuron.2013.03.005).
- 1116 **Ting JT**, Daigle TL, Chen Q, Feng G. Acute Brain Slice Methods for Adult and Aging Animals: Application of  
1117 Targeted Patch Clamp Analysis and Optogenetics. *Methods in Molecular Biology (Clifton, NJ)*. 2014; 1183:221–  
1118 242. doi: 10.1007/978-1-4939-1096-0\_14.
- 1119 **Ting JT**, Lee BR, Chong P, Soler-Llavina G, Cobbs C, Koch C, Zeng H, Lein E. Preparation of Acute Brain Slices  
1120 Using an Optimized N-Methyl-D-Glucamine Protective Recovery Method. *Journal of Visualized Experiments:*  
1121 *JoVE*. 2018 Feb; (132). doi: 10.3791/53825.
- 1122 **Tomassy GS**, Berger DR, Chen HH, Kasthuri N, Hayworth KJ, Vercelli A, Seung HS, Lichtman JW, Arlotta P. Distinct  
1123 Profiles of Myelin Distribution along Single Axons of Pyramidal Neurons in the Neocortex. *Science (New York,*  
1124 *NY)*. 2014 Apr; 344(6181):319–324. doi: [10.1126/science.1249766](https://doi.org/10.1126/science.1249766).
- 1125 **Urbanek S**, Horner J. Cairo: R Graphics Device Using Cairo Graphics Library for Creating High-Quality Bitmap  
1126 (PNG, JPEG, TIFF), Vector (PDF, SVG, PostScript) and Display (X11 and Win32) Output; 2020.
- 1127 **Virtanen P**, Gommers R, Oliphant TE, Haberland M, Reddy T, Cournapeau D, Burovski E, Peterson P, Weckesser  
1128 W, Bright J, van der Walt SJ, Brett M, Wilson J, Millman KJ, Mayorov N, Nelson ARJ, Jones E, Kern R, Larson E,  
1129 Carey CJ, et al. SciPy 1.0: Fundamental Algorithms for Scientific Computing in Python. *Nature Methods*. 2020;  
1130 17:261–272. doi: 10.1038/s41592-019-0686-2.

- 1131 **Walz A**, Omura M, Mombaerts P. Development and Topography of the Lateral Olfactory Tract in the Mouse:  
1132 Imaging by Genetically Encoded and Injected Fluorescent Markers. *Journal of Neurobiology*. 2006 Jul;  
1133 66(8):835–846. doi: [10.1002/neu.20266](https://doi.org/10.1002/neu.20266).
- 1134 **Wefelmeyer W**, Puhl CJ, Burrone J. Homeostatic Plasticity of Subcellular Neuronal Structures: From Inputs to  
1135 Outputs. *Trends in Neurosciences*. 2016 Oct; 39(10):656–667. doi: [10.1016/j.tins.2016.08.004](https://doi.org/10.1016/j.tins.2016.08.004).
- 1136 **Whitman MC**, Greer CA. Synaptic Integration of Adult-Generated Olfactory Bulb Granule Cells: Basal Axoden-  
1137 dritic Centrifugal Input Precedes Apical Dendrodendritic Local Circuits. *The Journal of Neuroscience: The*  
1138 *Official Journal of the Society for Neuroscience*. 2007 Sep; 27(37):9951–9961. doi: [10.1523/JNEUROSCI.1633-](https://doi.org/10.1523/JNEUROSCI.1633-07.2007)  
1139 [07.2007](https://doi.org/10.1523/JNEUROSCI.1633-07.2007).
- 1140 **Wickham H**. *Ggplot2: Elegant Graphics for Data Analysis*. Springer-Verlag New York; 2016.
- 1141 **Wickham H**, Averick M, Bryan J, Chang W, McGowan LD, François R, Grolemund G, Hayes A, Henry L, Hester J,  
1142 Kuhn M, Pedersen TL, Miller E, Bache SM, Müller K, Ooms J, Robinson D, Seidel DP, Spinu V, Takahashi K, et al.  
1143 Welcome to the Tidyverse. *Journal of Open Source Software*. 2019; 4(43):1686. doi: [10.21105/joss.01686](https://doi.org/10.21105/joss.01686).
- 1144 **Wickham H**, François R, Henry L, Müller K. *Dplyr: A Grammar of Data Manipulation*; 2019.
- 1145 **Wickham H**, Henry L. *Tidyr: Tidy Messy Data*; 2019.
- 1146 **Wickham H**, Hester J, Francois R. *Readr: Read Rectangular Text Data*; 2018.
- 1147 **Wilke CO**. *Cowplot: Streamlined Plot Theme and Plot Annotations for 'Ggplot2'*; 2019.
- 1148 **Xiao L**, Ohayon D, McKenzie IA, Sinclair-Wilson A, Wright JL, Fudge AD, Emery B, Li H, Richardson WD. Rapid  
1149 Production of New Oligodendrocytes Is Required in the Earliest Stages of Motor-Skill Learning. *Nature Neu-*  
1150 *roscience*. 2016 Sep; 19(9):1210–1217. doi: [10.1038/nn.4351](https://doi.org/10.1038/nn.4351).
- 1151 **Yamada R**, Kuba H. Structural and Functional Plasticity at the Axon Initial Segment. *Frontiers in Cellular Neu-*  
1152 *roscience*. 2016; 10:250. doi: [10.3389/fncel.2016.00250](https://doi.org/10.3389/fncel.2016.00250).
- 1153 **Yamaguchi M**, Manabe H, Murata K, Mori K. Reorganization of Neuronal Circuits of the Central Olfactory  
1154 System during Postprandial Sleep. *Frontiers in Neural Circuits*. 2013; 7:132. doi: [10.3389/fncir.2013.00132](https://doi.org/10.3389/fncir.2013.00132).
- 1155 **Yamamura T**, Konola JT, Wekerle H, Lees MB. Monoclonal Antibodies against Myelin Proteolipid Protein: Identi-  
1156 fication and Characterization of Two Major Determinants. *Journal of Neurochemistry*. 1991 Nov; 57(5):1671–  
1157 1680. doi: [10.1111/j.1471-4159.1991.tb06367.x](https://doi.org/10.1111/j.1471-4159.1991.tb06367.x).
- 1158 **Young KM**, Psachoulia K, Tripathi RB, Dunn SJ, Cossell L, Attwell D, Tohyama K, Richardson WD. Oligodendrocyte  
1159 Dynamics in the Healthy Adult CNS: Evidence for Myelin Remodeling. *Neuron*. 2013 Mar; 77(5):873–885. doi:  
1160 [10.1016/j.neuron.2013.01.006](https://doi.org/10.1016/j.neuron.2013.01.006).
